# Supplementary material for: Systematic characterization of human gut microbiome-secreted molecules by integrated multi-omics
Source: PubMed Central journal article supplement (PMC7612290; doi:10.1038/s43705-021-00078-0), 2021-12-21

1 **Supplementary information**

2 **Systematic characterization of human gut microbiome-secreted**  
3 **molecules by integrated multi-omics**

4 Bianca De Saedeleer<sup>1</sup>, Antoine Malabirade<sup>1</sup>, Javier Ramiro-Garcia<sup>1</sup>, Janine Habier<sup>1</sup>, Jean-Pierre  
5 Trezzi<sup>1,2</sup>, Samantha L. Peters<sup>3</sup>, Annegrät Daujeumont<sup>1</sup>, Rashi Halder<sup>1</sup>, Christian Jäger<sup>1</sup>, Susheel  
6 Bhanu Busi<sup>1</sup>, Patrick May<sup>1</sup>, Wolfgang Oertel<sup>4</sup>, Brit Mollenhauer<sup>5,6</sup>, Cédric C. Laczny<sup>1</sup>, Robert L.  
7 Hettich<sup>3</sup> and Paul Wilmes<sup>1,7\*</sup>

8 <sup>1</sup> Luxembourg Centre for Systems Biomedicine, University of Luxembourg, 7 avenue des Hauts-  
9 Fourneaux L-4362 Esch-sur-Alzette, Luxembourg.

10 <sup>2</sup> Integrated Biobank of Luxembourg, Luxembourg Institute of Health, 1, rue Louis Rech, L-3555  
11 Dudelange, Luxembourg.

12 <sup>3</sup> Oak Ridge National Laboratory, 1 Bethel Valley Road, Oak Ridge, Tennessee, 37830, USA.

13 <sup>4</sup>Department of Neurology, Philipps-University Marburg, Baldinger Str. 1, 35043 Marburg,  
14 Germany

15 <sup>5</sup>Department of Neurology, University Medical Center Goettingen, Robert-Koch-Str. 40, 37075  
16 Goettingen

17 <sup>6</sup>Paracelsus-Elena-Klinik, Klinikstr. 16, 34128 Kassel

18 <sup>7</sup>Department of Life Sciences and Medicine, Faculty of Science, Technology and Medicine,  
19 University of Luxembourg, 6 avenue du Swing, L-4367 Belvaux, Luxembourg.

20 \*Correspondence: paul.wilmes@uni.lu

21

22 This document includes:

23       Supplementary Materials and Methods

24       Supplementary References

25       Supplementary Note

26       Supplementary Figures S1 to S13

27       Supplementary Tables S1 to S13

28

## 29 **Supplementary Materials and Methods**

### 30 **Sample collection and handling**

31 Stool samples were collected from four healthy human volunteers. Samples were immediately  
32 flash-frozen in liquid nitrogen and stored at -80°C to guarantee optimal sample integrity and  
33 quality. Sample taking conformed to the Declaration of Helsinki and was approved by the ethics  
34 committee of the Physician's Board Hessen, Germany (FF 38/2016). The collected frozen stool  
35 samples were homogenized (6875D Freezer/Mill Spex - Instrument Solutions Benelux BV) and  
36 separated into 150 mg aliquots for subsequent biomolecular extractions. Each individual sample  
37 was measured to allow relative corrections of the fecal mass quantifications. Samples for bio-  
38 macromolecular extractions were incubated in RNAlater-ice, at -20°C, overnight prior to  
39 RNA/DNA/Protein extractions.

40

### 41 **Biomolecular extractions**

42 A summarized overview of the extraction protocol is depicted in Figure 1A.

#### 43 **Intracellular nucleic acids**

44 Three cold autoclaved 4 mm stainless steel milling balls (Retsch) were added to each 150 mg  
45 stool aliquot which were then homogenized by shaking for 2 min at 10 Hz in an Oscillating Mill  
46 MM 400 (Retsch), followed by centrifugation at 700 g for 2 min at 4°C. The supernatant was  
47 collected into a 2 mL Eppendorf tube and was subsequently centrifuged at 14 000 g for 5 min at  
48 4°C. After removal of the supernatant, cooled (by use of liquid nitrogen) stainless steel milling  
49 balls (5x(2mm) + 2x(5mm))] together with 600 µl of cold RLT buffer (containing 10 µl/ml of 2-  
50 mercaptoethanol) were added to the resulting interphase pellet. The tubes were then covered

51 with parafilm prior to re-suspension of the pellet by quick vortexing. Bead beating was performed  
52 for 30 seconds at 25 Hz in cold racks (4°C; Oscillating Mill MM 400, Retsch®). The resulting lysate  
53 was loaded onto a QIAshredder column and centrifuged for 2 min at 12 000 g. The flow-through  
54 was then transferred to an AllPrep DNA spin column (Qiagen) placed in a 2 ml collection tube and  
55 centrifuged for 1 min at 12 000 g. The AllPrep DNA spin column was placed in a new 2 mL  
56 collection tube (supplied) and stored at 4°C for later DNA purification.

57 The flow-through was used for the RNA purification using the AllPrep RNA Mini kit (Qiagen). First,  
58 400 µl of pure ethanol were added to the flow-through and mixed by pipetting. For each sample,  
59 700 µl were loaded onto an RNeasy spin column, which was placed in a 2 ml collection tube  
60 (supplied), and centrifuged for 1 min at 12 000 g. The flow-through was discarded. The spin  
61 column membrane was washed by first adding 700 µl Buffer RW1 and centrifuging for 1 min at  
62 12 000 g. Then, 500 µl Buffer RPE were added to the RNeasy spin column and centrifuged for 1  
63 min at 12 000 g. To wash the spin column membrane, 500 µl Buffer RPE were added to the  
64 RNeasy spin column again and centrifuged for 2 min at 12 000 g. The long centrifugation dries  
65 the spin column membrane, ensuring that no ethanol is carried over during RNA elution, as  
66 residual ethanol may interfere with downstream reactions. After centrifugation, the RNeasy spin  
67 column was carefully removed from the collection tube, avoiding contacting the flow-through.  
68 Otherwise, carryover of ethanol would have occurred. The collection tube containing the flow-  
69 through was discarded. To eliminate any possible carryover of Buffer RPE, or if residual flow-  
70 through remains on the outside of the RNeasy spin column, the column was placed in a new 2 ml  
71 collection tube and centrifuged for 1 min at 12 000 g. To elute the RNA, the RNeasy spin column  
72 was placed in a new 1.5 ml collection tube, 50 µl RNase-free water was added directly to the spin  
73 column membrane and centrifuged for 1 min at 12 000 g. This elution step was repeated once in  
74 a new tube.

75 Purification of the genomic DNA was obtained by use of the AllPrep DNA Mini kit (Qiagen). The  
76 AllPrep DNA spin column was first washed by adding 500 µl Buffer AW1 and centrifugation for 1  
77 min at 12 000 g. This step was repeated with 500 µl Buffer AW2 and centrifugation for 2 min. After  
78 placing the spin column in a new 1.5 ml collection tube, 100 µl Buffer EB (preheated to 70°C)  
79 were directly added to the spin column membrane and incubated at room temperature (15–25°C)  
80 for 2 min, and then centrifuged for 1 min at 12 000 g to elute the DNA. This elution step was  
81 repeated once in a new tube.

82

### 83 **Extracellular extraction of nucleic acids**

84 150 mg stool aliquots were gently resuspended in 900 µl of ice-cold sterile 1X D-PBS buffer  
85 (Sigma) to recover faecal water and any other extracellular material. In the case of RNA isolation,  
86 1 µl of Riboguard RNase Inhibitor at 100 U/µl was added (Lucigen). The resuspended samples  
87 were centrifuged at 10 000 g at 4°C for 10 min and the recovered supernatant was filtered through  
88 a 0.2 µm PS membrane. As the quantity in material from the extracellular space was expected to  
89 be lower than within cells, extracellular nucleic acid isolation was performed using cell-free  
90 extraction kits. These are optimized for extracting low amounts of material from circulating fluids.  
91 For each isolated fraction, a blank extraction was also included and subjected to an identical  
92 protocol to check for the possible presence of any external contaminations (Table S3). Small RNA  
93 was purified using the NucleoSpin miRNA Plasma kit (Macherey-Nagel) according to the  
94 manufacturer's instructions, including on-column rDNase digestion to remove contaminant DNA.  
95 RNA was eluted in 30 µl nuclease-free water. DNA was purified using the same kit, omitting  
96 rDNase treatment. DNA was eluted in 100 µl of ultrapure water. RNaseA digestion was performed  
97 afterwards to remove any contaminant RNA and with achieving a final concentration of 20 µg.ml-  
98 1. Samples were incubated for 60 min at 65°C. To further concentrate the DNA and inactive

99 RNase, 10% volume of 3 M sodium acetate at pH 5.2 and 2.5 volumes of absolute ethanol were  
100 added, followed by a 1h incubation, and the tubes were centrifuged at 11 000 g during 30 min at  
101 room temperature. The supernatant was discarded, and the DNA pellet was rinsed with 500 µl of  
102 70% ethanol. The DNA was then air-dried for 15 min before being resuspended in 40 µl of  
103 nuclease-free water. Large RNA was purified using the NucleoSpin RNA Blood kit from Macherey-  
104 Nagel according to the manufacturer's instructions, including proteinase K and on-column rDNase  
105 digestions. RNA was eluted in 60 µl of nuclease-free water. 1 µl of obtained nucleic acids was  
106 quality-checked with an Agilent 2100 Bioanalyzer on a Small RNA chip, RNA 6000 Nano chip or  
107 DNA high sensitivity chip for small RNA, large RNA and DNA respectively, allowing quantification  
108 (Figure S1-2). The purity of the different fractions was analyzed using Nanodrop (ThermoFisher),  
109 and their concentrations were determined using Qubit (ThermoFisher), according to the user's  
110 manual (Figure S1A). Samples were frozen at -80°C until sequencing.

111

## 112 **Extraction of extracellular proteins**

113 For each individual, a 150 mg stool aliquot was gently resuspended in 900 µl of ice-cold 50 mM  
114 sodium-phosphate buffer, pH 7.4, supplemented with cComplete Mini Protease Inhibitor Cocktail  
115 (Roche), and was processed the same way as the extracellular nucleic acid fractions, including  
116 centrifugation and filtration of the supernatant. Sodium deoxycholate (DOC) was added to a final  
117 concentration of 0.15% weight per volume to facilitate the precipitation of lowly abundant proteins.  
118 Following this, trichloroacetic acid (TCA) was added to a final concentration of 10% volume per  
119 volume and the sample was vortexed before a 30 min incubation on ice. A subsequent 15 min  
120 centrifugation at 10 000 g and 4°C allowed for proper protein precipitation. The pellet was then  
121 washed and centrifuged twice with 1.5 ml of ice-cold acetone before being dried under vacuum  
122 to remove any trace of any solvent. Finally, the protein pellet was resuspended in 100 µl of 50

123 mM sodium-phosphate buffer, pH 7.4, with the help of 2% w/v SDS and 15 sonication-bath cycles  
124 of 30s on / 30s off for complete solubilization. The protein concentration was determined by Qubit  
125 (according to the manufacturer's manual), as well as by a bicinchoninic acid assay (BCA)  
126 following the micro-plate protocol according to the manufacturer's instructions (ThermoFisher,  
127 averaging two technical duplicates for each sample (Figure S1B). Then, 150 µg of proteins were  
128 subjected to SDS-PAGE separation using a Criterion TM XT precast 12% Bis-Tris gel (Biorad).  
129 Electrophoresis was run on ice in MOPS buffer at 150 V for 1 hour 30 min. The gel was stained  
130 with Imperial Protein stain (Thermo Scientific) and each lane was cut into 11 pieces to isolate  
131 distinct protein sizes (Figure S3). The gel slices were frozen at -20°C and ready for tryptic  
132 digestion and mass spectrometry. A summary of the quantity of the extracellular macromolecules  
133 from the extractions is shown in Table S1-2.

134

### 135 **Metabolite extractions – untargeted approach**

136 To extract metabolites from stool samples, 500 µL of MilliQ water were added to 50 mg faecal  
137 matter. Then, samples were homogenized using a Precellys24 homogenizer (Bertin  
138 Technologies) using 5 ceramic beads (1.4 mm) and one 30 s cycle at 6000 rpm (0 to 5 °C).  
139 The homogenate was centrifuged at 21,000 x g for 5 min at 4 °C. Polar metabolites were  
140 extracted by transferring 50 µL of the supernatant into a new 0.5 mL Eppendorf tube and  
141 adding 20 µL of internal standard mix, consisting of U-13C5 ribitol (c = 150 µg/mL; Omicron  
142 Biochemicals), pentanedioic-d6 acid (c = 150 µg/mL; C/D/N Isotopes Inc.) and tridecanoic-d25  
143 acid (c = 100 µg/mL; C/D/N Isotopes Inc.) in MilliQ water [1]. This was followed by protein  
144 precipitation and a liquid-liquid extraction (LLE). First, 40 µL of the particulate-free homogenate  
145 was added to 160 µL Methanol. The mix was vortexed for 10 s, then incubated for 5 min at  
146 2000 rpm and 15 °C (Eppendorf ThermoMixer Comfort), followed by a centrifugation at 21,000  
147 x g for 5 min (15 °C). Then, 175 µL of the protein-free supernatant was added to 140 µL

148 Chloroform and 90  $\mu$ L MilliQ water. The mixture was vortexed and incubated for 10 min at 2000  
149 rpm and 15 °C. After centrifugation at 21,000 x g for 10 min (15 °C), 200  $\mu$ L of upper phase  
150 containing polar metabolites were transferred in separate GC vials with micro insert and  
151 evaporated at -4°C for 4h, followed by 25 min at 25°C (Labconco CentriVap) [1]. The fractions  
152 were subsequently analyzed with gas chromatography-mass spectrometry (GC-MS).  
153 Metabolite derivatization was performed using a multi-purpose sampler (GERSTEL). Dried  
154 polar sample extracts were dissolved in 20  $\mu$ L pyridine, containing 20 mg/mL of methoxyamine  
155 hydrochloride (Sigma-Aldrich), and incubated under shaking for 120 min at 45 °C. After adding  
156 20  $\mu$ L N-methyl-N-trimethylsilyl-trifluoroacetamide (MSTFA; Macherey-Nagel), samples were  
157 incubated for additional 30 min at 45 °C under continuous shaking.

158 GC-MS analysis was performed by using an Agilent 7890B GC – 5977A MS instrument (Agilent  
159 Technologies). A sample volume of 1  $\mu$ L was injected into a Split/Splitless inlet, operating in  
160 split mode (10:1) at 270 °C. The gas chromatograph was equipped with a 5 m guard column  
161 + 30 m (I.D. 250  $\mu$ m, film 0.25  $\mu$ m) DB-35MS capillary column (Agilent J&W GC Column).  
162 Helium was used as carrier gas with a constant flow rate of 1.4 mL/min.

163 The GC oven temperature was held at 90 °C for 1 min and increased to 280 °C at 20 °C/min.  
164 Then, the temperature was increased to 325 °C and held for 4.5 min (post run time). The total  
165 run time was 15 min. The transfer line temperature was set constantly to 280 °C. The mass  
166 selective detector (MSD) was operating under electron ionization at 70 eV. The MS source  
167 was held at 230 °C and the quadrupole at 150 °C. Full scan mass spectra were acquired from  
168  $m/z$  70 to 600. All GC-MS chromatograms were processed using MetaboliteDetector,  
169 v3.220190704 [2]. Compounds were annotated by retention time and mass spectrum using an  
170 in-house mass spectral library. The following deconvolution settings were applied: Peak  
171 threshold: 5; Minimum peak height: 5; Bins per scan: 10; Deconvolution width: 5 scans; No  
172 baseline adjustment; Minimum 15 peaks per spectrum; No minimum required base peak  
173 intensity. The internal standards (U-13C5-ribitol and pentanedioic-d6 acid for polar fraction;



174 tridecanoic-d25 acid for nonpolar fraction) were added at the same concentration to every  
175 sample to correct for uncontrolled sample losses, analyte degradation during metabolite  
176 extraction and sensitivity drifts during measurements. The dataset was normalized by using  
177 the response ratio of the integrated peak area of the analyte and the integrated peak area of  
178 the internal standard. A heatmap on the measured intensities (Table S11) of the obtained  
179 metabolites is provided in Figure S4.

180

### 181 **Metabolite extraction – short-chain fatty acids**

182 To extract short-chain fatty acids from the stool samples, 500  $\mu$ L of MilliQ water, containing 2-  
183 ethylbutyric acid ( $c = 2$  mmol/L) as internal standard, were added to 50 mg of faecal matter. Then,  
184 samples were homogenized followed by centrifugation using the same parameters as described  
185 above. 200  $\mu$ L of the supernatant were acidified with 10  $\mu$ L of 37% hydrochloric acid, followed by  
186 an incubation step for 15 min at 2000 rpm and 15 °C (Eppendorf ThermoMixer Comfort). Then, 1  
187 mL of diethyl ether were added. The samples were vortexed for 15 min at 2000 rpm and 15 °C.  
188 The upper organic phase was separated by centrifugation (5 min, 21,000 x g, 15 °C) and 900  $\mu$ L  
189 were collected in a new reaction tube. A further 1 mL of diethyl ether was then added to the  
190 conditioned medium, and the tube was incubated, and its contents separated by centrifugation.  
191 Then, 900  $\mu$ L of the organic phase were combined with the first extract, and 250  $\mu$ L of this  
192 combined mixture were transferred into a GC glass vial with micro insert, in triplicate. For  
193 derivatization, 25  $\mu$ L of N-tert-Butyldimethylsilyl-Nmethyltrifluoroacetamide (MTBSTFA) with 1%  
194 tert-Butyldimethylchlorosilane (TBDMSCI, Restek) was added, and the samples were incubated  
195 for a minimum of 2 h at room temperature. SCFAs were analyzed using GC-MS. Further  
196 measurement parameters have been previously described [3]. For precise quantification,  
197 measurements were performed in selected ion monitoring mode. GC-MS chromatograms were  
198 processed using Agilent MassHunter Quantitative Analysis (ver. B.08.00, Build 8.0.598.0). Target

199 compounds were identified by retention time and ion ratios using an in-house mass spectral  
200 library. The data set was normalized by using the response ratio of the integrated peak area of  
201 the target compound and the integrated peak area of the internal standard. Absolute  
202 concentrations were determined using calibration curves made of authentic standards. The  
203 obtained measurements are shown in Table S10 and summarized in Figure 2C.

204

### 205 **Metabolite extractions – bile acids**

206 To extract metabolites from stool samples, 500 µl of MilliQ water were added to 50 mg faecal  
207 matter. Then, samples were homogenized followed by centrifugation using the same parameters  
208 as described above. To extract bile acids, a total volume of 100 µl of the supernatant was added  
209 to 100 µl MilliQ water, incl. internal standards (cholic-d4 Acid, deoxycholic-d4 Acid, lithocholic-d4  
210 Acid, glycocholic-d4 Acid; c = 1 µg/ml each; C/D/N Isotopes) and vortexed. Following this, 100 µl  
211 of the mixture was introduced into 500 µl of ice-cold acetonitrile and incubated for 5 min at 4°C  
212 under shaking followed by centrifugation at 21,000 x g for 5 min. The supernatant was collected  
213 and filtered using a Phree phospholipid removal plate (Phenomenex). 500 µl were concentrated  
214 under vacuum (SpeedVac, Labconco) at -4°C overnight. The resultant dry residues were  
215 reconstituted in 100 µl of ACN/MeOH/H2O mixture (1:1:2) and transferred to LC vials for LC-  
216 HRMS analysis. The analyses were performed using a Dionex Ultimate3000 LC coupled to a  
217 Thermo Q Exactive MS instrument. Chromatography was carried out with a Waters ACQUITY  
218 UPLC CSH C18 1.7 µm (2.1 mm x 100 mm) column and VanGuard pre-column (2.1mm x 5 mm)  
219 maintained at 60 °C. The autosampler was kept at 4 °C. The flow rate was set to 0.3 ml/min and  
220 the mobile phases consisted of 5 mM ammonium acetate in water (Eluent A) and 50:50  
221 Methanol/Acetonitrile (Eluent B). The run consisted of linear gradient from 40% B to 65% B over  
222 6 min, followed by a linear gradient to 95% B over 3 min, isocratic delivery of 95% B for 9 min,

223 and a re-equilibration phase on starting conditions with 40%B for 7 min. The injection volume was  
224 3  $\mu$ l. All the MS experiments were performed using electrospray ionization in negative mode (-  
225 ESI). The source and ion transfer parameters applied were as follows: spray voltage 3.5 kV. The  
226 sheath gas, aux gas, the capillary temperature and the heater temperature were maintained at  
227 45, 10 (arbitrary units), 300°C and 300 °C, respectively. The S-Lens RF level was set at 50. The  
228 Orbitrap mass analyser was operated at a resolving power of 35 000 in full-scan mode (scan  
229 range: m/z 100...620; automatic gain control (AGC) target: 3e6; injection time: 100 ms). Mass  
230 spectrometric data were acquired with Thermo Xcalibur software (Version 4.1.31.9) and analysed  
231 with TraceFinder (Version 4.1). For unambiguous annotation of the target compounds, an in-  
232 house library with retention times and MS/MS spectra were used. The identity of all bile acids was  
233 confirmed by MS/MS and standard addition experiments. Target peak area was normalized by  
234 corresponding internal standard peak area. Absolute concentrations were determined using  
235 calibration curves made of authentic standards. The obtained measurements are shown in Table  
236 S10 and summarized in Figure 2C.

237

## 238 **Metagenomics**

239 200-300 ng of intracellular DNA was sheared using Bioruptor NGS (Diagenode, UCD300) with  
240 30s ON and 30s OFF for 20 cycles. The sequencing libraries were prepared using TruSeq Nano  
241 DNA library preparation kit (Illumina, FC-121-4002) using the protocol provided with the kit. The  
242 libraries were prepared considering a 350 bp average insert size. Prepared libraries were  
243 quantified using Qubit (Invitrogen) and the quality was checked on a Bioanalyzer (Agilent).  
244 Sequencing was performed on a NextSeq500 (Illumina) instrument using 2x150 bp read length  
245 at the LCSB Sequencing Platform.

246 For the extracellular DNA fraction, 150 ng of DNA per sample was used for library preparation  
247 using the TrueSeq Nano DNA Kit (Illumina). The libraries were prepared considering 350 bp  
248 average insert size and sequenced similarly to the intracellular DNA.

249

## 250 **Metatranscriptomics**

251 2 µg of large RNA per sample was subjected to rRNA removal (Ribo-Zero rRNA Removal Kit,  
252 Illumina) before library preparation (True stranded mRNA LT Kit, Illumina). The average insert  
253 size was 400 bp. 500 ng of small RNA per sample was used for library preparation using NEBNext  
254 Multiplex Small RNA Library Prep Kit for Illumina (NEB), including AMPure XP magnetic beads-  
255 based size-selection of small RNA. The average size was 190 bp.

256

## 257 **Sequencing**

258 The insert size and the quality of libraries were checked with an Agilent 2100 Bioanalyzer and  
259 quantified using the Qubit dsDNA HS assay kit. Libraries were diluted to 4 nM each, pooled,  
260 denatured and sequenced for 2 × 150 cycles on a NextSeq500 (Illumina) instrument according to  
261 the manufacturer's instructions, except for the sRNA libraries that was sequenced at 1x75 bp read  
262 length. The raw sequence libraries are deposited in the European Nucleotide Archive (ENA) at  
263 EMBL-EBI under accession number PRJEB44766.

264

## 265 **Metaproteomics**

266 Extraction of proteins from the gel bands and subsequent digestion was performed using an in-  
267 gel digestion protocol described previously [4]. Briefly, the excised gel pieces were rinsed with  
268 two successive additions of 1 ml HPLC-grade water. Gel pieces were de-stained using 50 mM  
269 acetonitrile/50 mM ammonium bicarbonate (1:1, vol/vol) and the gel pieces were pulverized with  
270 a pestle before incubation for 30 min. 100% acetonitrile was added to dehydrate and shrink the  
271 de-stained gel fragments, and then as much liquid as possible was removed without disturbing  
272 any of the gel fragments to prepare fragments for digestion. Proteomics-grade trypsin was  
273 dissolved to 13 ng/l in a 10 mM ammonium bicarbonate buffer containing 10% (vol/vol)  
274 acetonitrile. 100 l of the trypsin solution was added to cover the gel fragments and incubated  
275 at 4°C for 2 hours. After rehydration, the gel fragments were incubated and shaken overnight at  
276 37°C and 600 rpm. Following digestion, peptides were extracted from the gel matrix using 5%  
277 formic acid/acetonitrile solution in a ratio of 1:2 sample volume: extraction buffer and incubated  
278 for 15 min at 37°C. The supernatant containing the extracted peptides was transferred to a clean  
279 tube and dried down using a SpeedVac centrifuge. The digested peptides were resuspended in  
280 solvent A (95% water/5% acetonitrile/0.1% formic acid) and peptide concentration was measured  
281 by a NanoDrop OneC (ThermoScientific) using absorbance at 205 nm. The obtained proteolytic  
282 peptides were analyzed via an automated nanospray Vanquish LC-QExactive-Plus Orbitrap mass  
283 spectrometer system outfitted with a 100 µm ID trapping column coupled to an in-house pulled  
284 75 µm ID analytical column. Both the trapping column and analytical columns were packed with  
285 5µm Kinetex C-18 RP resin (Phenomenex) to 6 cm and 25 cm, respectively. For each gel  
286 segment, 10µL of digested peptides was loaded, desalted, separated and analyzed with the  
287 following parameters: loading and desalting in 100% solvent A for 30 min, separation with a 65  
288 min linear gradient up to 25% solvent B (30% water/70% acetonitrile/0.1% formic acid), another  
289 increase to 50% solvent B for 5 min, re-equilibration back to 100% solvent A for 5 min, and a  
290 wash in 100% solvent A for 15 min. All eluting peptides were measured and sequenced under  
291 data-dependent acquisition on the Q Exactive mass spectrometer. An overview of the quantities

292 of extracted proteins from each sample is presented in Table S3. The raw MS files are deposited  
293 in the MassIVE, ProteomeXchange and PRIDE databases under the experiment accession  
294 numbers MSV000086973 and PXD024472, respectively.

295

## 296 **Bioinformatic analyses**

### 297 **Metagenomics and metatranscriptomics**

298 Integrated analysis of the metagenomic and metatranscriptomic data was performed using IMP  
299 (v1, default settings) [5]. First, adapters from all sequenced samples (int-DNA, int-RNA, ex-DNA,  
300 ex-IRNA and ex-sRNA) were removed with Cutadapt (v.2.4) [6] and rRNA sequences were filtered  
301 from all RNA fractions (int-RNA, ex-IRNA and ex-sRNA) by SortMeRNA (v2.0, default settings)  
302 [7] to obtain putative mRNA sequences. To obtain a meta-genome and meta-transcriptome (MG-  
303 MT) reference for each individual, int-DNA and int-RNA reads were co-assembled into contigs by  
304 iterative alignment using the BWA-MEM aligner (v0.7.17) [8]. Co-assembled contigs were binned  
305 using two different algorithms MetaBAT 2 (v.2.12.1) [9] and MaxBin 2.0 (v2.2.6) [10] and their  
306 results were refined with DAS Tool (v0.9.24, default settings) [11] to further optimize the binning.  
307 Taxonomical annotation of those bins was done with GTDB-Tk (v0.3.2, default settings) [12].  
308 Open Reading Frames (ORFs) as a proxy for genes were inferred from these MG-MT references  
309 using Prokka (v1.13.7, default settings) [13] and functional annotation of those predicted genes  
310 was done with eggNOG-mapper (v1.0.3) [14] (Table S8). In addition to the discussed IMP  
311 pipeline, gene counts for all fractions (int-DNA, int-RNA, ex-DNA, ex-IRNA and ex-sRNA) were  
312 calculated using featureCounts (v1.6.4, default settings) [15], after aligning the reads to the  
313 references with BWA-MEM [8]. Taxonomic classification for all fractions was performed on the  
314 co-assembled contigs using Kraken2 (v2.0.8) [16] against its standard default database (Figure  
315 2A, Table S6). Functional annotation was obtained according to Clusters of Orthologous Groups

316 (COG) (Figure 2B, Table S7). Furthermore, Shannon diversities (Figure S4, Table S4) and  
317 concordance correlation coefficients (Table S5) [17] were calculated on the obtained taxonomic  
318 and functional annotation for all fractions. Subsequently to integrate the findings, all data from the  
319 individual fractions were grouped as represented in Fig. 2, by linking the taxonomic and functional  
320 affiliations across fractions from each individual. For the comparison of the various biomolecular  
321 fractions at the nucleotide level, Sourmash was used to create *signatures* using the default K-  
322 mer value of 31 [18]. The figures for Sourmash were generated by the tool using its inbuilt  
323 functions. All other plots aside from the Upset plots were generated using the R package ggplot2  
324 [19]. The Upset plots were generated using the ComplexUpset package in R [20].

325

## 326 **Metaproteomics**

327 A concatenated database was created for each sample using the co-assembled contigs obtained  
328 from the previously described intracellular omics analysis of each individual, the human proteome,  
329 common contaminants, and reversed sequences to assess false discovery rates (FDR).  
330 Experimental MS/MS spectra were searched using the MyriMatch [21] search algorithm  
331 (v2.1.138) with the following settings: peptide-spectrum matches (PSM) were required to be fully  
332 tryptic with up to two missed cleavages, static cysteine modification of 57.0214 Da and dynamic  
333 oxidation modifications of 15.9949 Da on methionine residues were included in the searches.  
334 Resulting peptide-spectrum matches were filtered at a final peptide-level FDR <1% using IDPicker  
335 [22] (v3.1.642.0). The proteome database was clustered at 100% amino acid sequence identity,  
336 and peptides were reassigned to protein groups based on the clustering. The peptide  
337 chromatographic AUC (area under the curve) intensities were used to assemble proteins by  
338 summing only peptide intensities that uniquely mapped to one protein group. For each protein  
339 group, the abundances of each gel band fraction were summed to obtain sample-level

340 abundances. All four sample-specific databases used for searching were clustered together at  
341 100% amino acid sequence identity. Sample-specific protein groups were assigned to  
342 experiment-wide protein groups based on the clustering to compare protein abundances across  
343 all four individuals more easily. The resulting protein group-level intensities were log-transformed,  
344 normalized at the sample level by LOESS, and standardized across the entire dataset by median  
345 absolute deviation (MAD) and median centering using InfernoRDN [23] (Table S9).

346

### 347 **Metabolomics**

348 The functional annotations of the predicted genes obtained through eggNOG-mapper were  
349 manually compared to the metabolites identified in the metabolite fraction.

350

### 351 **Supplementary References**

352 1. Glaab E, Trezzi J-P, Greuel A, Jäger C, Hodak Z, Drzezga A, et al. Integrative analysis of  
353 blood metabolomics and PET brain neuroimaging data for Parkinson's disease. *Neurobiol Dis.*  
354 2019 Apr 1; **124**: 555–62.

355 2. Hiller K, Hangebrauk J, Jäger, C, Spura J, Schreiber K, Schomburg D. MetaboliteDetector:  
356 Comprehensive Analysis Tool for Targeted and Nontargeted GC/MS Based Metabolome  
357 *Analysis. Anal Chem.* 2009; **81**, 9, 3429–3439

358 3. Greenhalgh K, Ramiro-Garcia J, Heinken A, Ullmann P, Bintener T, Pacheco MP, et al.  
359 Integrated In Vitro and In Silico Modeling Delineates the Molecular Effects of a Synbiotic Regimen  
360 on Colorectal-Cancer-Derived Cells. *Cell Rep.* 2019 Apr 30; **27(5)**: 1621-1632.e9.



- 361 4. Shevchenko A, Tomas H, Havli J, Olsen J, Mann M. In-gel digestion for mass  
362 spectrometric characterization of proteins and proteomes. *Nat Protoc.* 2006; **1(6)**: 2856–60.
- 363 5. Narayanasamy S, Jarosz Y, Muller EEL, Heintz-Buschart A, Herold M, Kaysen A, et al.  
364 IMP: a pipeline for reproducible reference-independent integrated metagenomic and  
365 metatranscriptomic analyses. *Genome Biol.* 2016 Dec; **17(1)**: 260.
- 366 6. Martin M. Cutadapt removes adapter sequences from high-throughput sequencing reads.  
367 *EMBnet.journal.* 2011 May 2; **17(1)**: 10–2.
- 368 7. Kopylova E, Noé L, Touzet H. SortMeRNA: fast and accurate filtering of ribosomal RNAs  
369 in metatranscriptomic data. *Bioinformatics.* 2012; **28(24)**: 3211–7.
- 370 8. Li H, Durbin R. Fast and accurate short read alignment with Burrows–Wheeler transform.  
371 *Bioinformatics.* 2009 Jul 15; **25(14)**: 1754–60.
- 372 9. Kang DD, Li F, Kirton E, Thomas A, Egan R, An H, et al. MetaBAT 2: an adaptive binning  
373 algorithm for robust and efficient genome reconstruction from metagenome assemblies. *PeerJ.*  
374 2019 Jul 26; **7**: e7359.
- 375 10. Wu Y-W, Simmons BA, Singer SW. MaxBin 2.0: an automated binning algorithm to  
376 recover genomes from multiple metagenomic datasets. *Bioinformatics.* 2016 Feb 15; **32(4)**: 605–  
377 7.
- 378 11. Sieber CMK, Probst AJ, Sharrar A, Thomas BC, Hess M, Tringe SG, et al. Recovery of  
379 genomes from metagenomes via a dereplication, aggregation and scoring strategy. *Nat Microbiol.*  
380 2018 Jul; **3(7)**: 836–43.
- 381 12. Chaumeil P-A, Mussig AJ, Hugenholtz P, Parks DH. GTDB-Tk: a toolkit to classify  
382 genomes with the Genome Taxonomy Database. *Bioinformatics.* 2020 Mar 1; **36(6)**: 1925–7.

- 383 13. Seemann T. Prokka: rapid prokaryotic genome annotation. *Bioinformatics*. 2014 Jul 15;  
384 **30(14)**: 2068–9.
- 385 14. Huerta-Cepas J, Forslund K, Coelho LP, Szklarczyk D, Jensen LJ, von Mering C, et al.  
386 Fast Genome-Wide Functional Annotation through Orthology Assignment by eggNOG-Mapper.  
387 *Mol Biol Evol*. 2017 Aug 1; **34(8)**: 2115–22.
- 388 15. Liao Y, Smyth GK, Shi W. featureCounts: an efficient general purpose program for  
389 assigning sequence reads to genomic features. *Bioinforma Oxf Engl*. 2014 Apr 1; **30(7)**: 923–30.
- 390 16. Wood D, Lu J, Langmead B. Improved metagenomic analysis with Kraken 2. *Genome*  
391 *Biol*. 2019; **20**: 257.
- 392 17. Lin LI-K. A Concordance Correlation Coefficient to Evaluate Reproducibility. *Biometrics*.  
393 1989; **45(1)**: 255–68.
- 394 18. Pierce NT, Irber L, Reiter T et al. Large-scale sequence comparisons  
395 with *sourmash*. *F1000Research* 2019, **8**: 1006.
- 396 19. Wickham H. *ggplot2: Elegant Graphics for Data Analysis*. Springer; 2016. 266 p.
- 397 20. Michał Krassowski. (2020). *krassowski/complex-upset*. Zenodo.  
398 <http://doi.org/10.5281/zenodo.3700590>
- 399 21. Tabb D, Fernando C, Chambers M. MyriMatch: highly accurate tandem mass spectral  
400 peptide identification by multivariate hypergeometric analysis. *J Proteome Res*. 2007 Jan 18; **6**:  
401 654–61.

402 22. Ma Z-Q, Dasari S, Chambers MC, Litton MD, Sobecki SM, Zimmerman LJ, et al. IDPicker  
403 2.0: Improved Protein Assembly with High Discrimination Peptide Identification Filtering. *J*  
404 *Proteome Res.* 2009 Aug 7; **8(8)**: 3872–81.

405 23. Polpitiya AD, Qian WJ, Jaitly N, Petyuk VA, Adkins JN, Camp DG 2nd, et al. DANTE: a  
406 statistical tool for quantitative analysis of -omics data. *Bioinformatics.* 2008; **24(13)**: 1556–8.

407

## 408 **Supplementary Figures**

409 *Provided as separate files:*

410 **Figure S1:** Illustration depicting the integrated workflow, whereby the iterative metagenomic and  
411 metatranscriptomic co-assembly is used to search the metaproteomic spectra. The metabolomic  
412 data is subsequently used for downstream integration and visualisation.

413 **Figure S2:** An example overview for the integrated multi-omics analyses depicting the presence  
414 and relative abundance of the individual omic data for the L-threonine → Propionic acid pathway.  
415 The values represent the mean of the relative abundances across Individuals 1 to 4, whereby the  
416 check marks indicate the detection within the respective dataset.

417 **Figure S3:** Concentrations (ng per mg stool) of the different extracellular nucleic acid (A) and  
418 protein (B) fractions (logarithmic scale), obtained by Bioanalyzer, Qubit, Nanodrop and/or BCA  
419 analysis. Error bars represent the standard deviation on four independent samples. ex-sRNA:  
420 extracellular small RNA; ex-lRNA: extracellular large RNA; ex-DNA: extracellular DNA; ex-Prot:  
421 extracellular proteins.

422 **Figure S4:** Electropherograms from the of extracted extracellular nucleic acids. A. Extracellular  
423 DNA (DNA high sensitivity chip). B. Extracellular large RNA (RNA 6000 Nano chip). C.

424 Extracellular small RNA (Small RNA chip). Each extraction was performed for four individuals with  
425 a buffer-only control and 1  $\mu$ l of each sample was run on the Agilent 2100 Bioanalyzer.

426 **Figure S5:** SDS-PAGE gel image of extracted extracellular protein fractions. A. Extracellular  
427 proteins profiles from Individual 1 to 4 (150  $\mu$ g/lane) and an extraction blank are presented from  
428 left to right. The figure is a montage of two gels, run under the same conditions, separated by a  
429 solid line. One lane was cut out from the gel, symbolized by a dashed line. B. Full length  
430 uncropped gel for Individual 1.

431 **Figure S6:** Comparison of the average relative abundances of DNA/RNA/Prot in our extracellular  
432 extractions (A) and the repartition expected inside a bacterial cell [20] (B). A. The obtained  
433 composition of the extracted extracellular mass (DNA, RNA and Prot) in %, before experimental  
434 rRNA depletion. Percentages are relative to the original stool mass used for extraction. B.  
435 Average intracellular composition (DNA, RNA and Prot) of a bacterial cell in % dry weight. Figure  
436 is adapted from estimations based on experimental data obtained in *E. coli* [20] where only the  
437 DNA/RNA/Prot relative abundances were retained. ex-sRNA: extracellular small RNA; ex-IRNA:  
438 extracellular large RNA.

439 **Figure S7:** Relative abundance (%) of *Roseburia* spp. in each extracted fraction for each  
440 individual separately.

441 **Figure S8:** Shannon diversities of the taxa (A) and functions (B) for each ome and individual.  
442 More variation can be observed between the individual diversities of the taxa within and between  
443 the different omes. Individual diversities of the functions are more similar within and between the  
444 different omes, with ex-IRNA and ex-sRNA being divergent. int-DNA: intracellular DNA; ex-DNA:  
445 extracellular DNA; int-RNA: intracellular RNA; ex-sRNA: extracellular small RNA; ex-IRNA:  
446 extracellular large RNA; ex-Prot: extracellular proteins.

447 **Figure S9:** Sourmash plots assessing the overlap between the intra- and extracellular fractions  
448 of the different biomolecules for each individual separately. Heatmap of the nucleic acid  
449 signatures for the intra- and extracellular fractions demonstrating the hierarchical clustering based  
450 on Ward's algorithm and average linkage, between fractions for each individual.

451 **Figure S10:** Upset plots indicating the overlap between the taxonomic affiliations for each fraction  
452 within each individual. The bar plots represent the relative abundance of the taxa overlapping  
453 across the fractions, while the intersect sizes indicate the number of common taxa.

454 **Figure S11:** Functional overlap. The functional overlap for each fraction for each individual are  
455 shown in the Upset plots. The bar plots represent the relative abundance of the functions  
456 overlapping across the fractions, while the intersect sizes indicate the number of common  
457 functions. Abbreviations of the functional categories: A: RNA processing and modification; B:  
458 Chromatin structure and dynamics; C: Energy production and conversion; D: Cell cycle control:  
459 cell division: chromosome partitioning; E: Amino acid transport and metabolism; F: Nucleotide  
460 transport and metabolism; G: Carbohydrate transport and metabolism; H: Coenzyme transport  
461 and metabolism; I: Lipid transport and metabolism; J: Translation: ribosomal structure and  
462 biogenesis; K: Transcription; L: Replication: recombination and repair; M: Cell  
463 wall/membrane/envelope biogenesis; N: Cell motility; O: Post-translational modification: protein  
464 turnover and chaperones; P: Inorganic ion transport and metabolism; Q: Secondary metabolites  
465 biosynthesis: transport and catabolism; S: Function unknown; T: Signal transduction  
466 mechanisms; U: Intracellular trafficking: secretion and vesicular transport; V: Defense  
467 mechanisms; Z: Cytoskeleton.

468 **Figure S12:** Relative abundance (%) of *Methanobrevibacter smithii* in each extracted fraction for  
469 each individual separately.

470 **Figure S13:** Heatmap of the relative abundances of metabolites for each individual measured in  
471 an untargeted GC-MS. Low abundances are indicated in light blue; higher abundances are shown  
472 in dark blue and red.

473

## 474 **Supplementary Tables**

475 *Provided as separate files:*

476 **Table S1:** Quantities of the extracted extracellular macromolecules relative to the stool mass from  
477 each individual.

478 **Table S2:** Quantities of the proteins extracted from each sample.

479 **Table S3:** Measurements on the purified fractions of the blank samples. An x indicates that the  
480 analysis was not performed on that particular sample.

481 **Table S4:** PERMANOVA-based estimations of significantly different taxa between fractions,  
482 within individuals. The adjusted  $p$ -value is considered to be significant when below 0.05.

483 **Table S5:** Mean ( $\pm$ SD) Shannon diversities on the taxonomic and functional composition for each  
484 ome across the four individuals.

485 **Table S6:** Mean ( $\pm$ SD) concordance correlation coefficients on the taxonomic and functional  
486 composition for each ome across the four individuals.

487 **Table S7:** PERMANOVA-based estimations of significantly different functions when comparing  
488 fractions, within individuals. A  $p$ -value less than 0.05 is considered to be significant.

489 **Table S8:** Taxonomic annotation up to species level and corresponding number of reads for each  
490 sample. Undetermined annotations are represented by the first letter of the corresponding level.  
491 Figure 2A is based on this information. (Available online via Figshare; DOI:  
492 10.6084/m9.figshare.c.5694595.v1).

493 **Table S9:** Functional annotation (COG) and corresponding number of reads for each sample.  
494 Figure 2B is based on this information.

495 **Table S10:** Functional annotation, corresponding counts, genes and taxonomy of the obtained  
496 contigs for every fraction from each individual. (Available online via Figshare; DOI:  
497 10.6084/m9.figshare.c.5694595.v1).

498 **Table S11:** Raw and normalized protein intensities for each individual obtained after LC-MS/MS  
499 based metaproteomics analysis. (Available online via Figshare; DOI:  
500 10.6084/m9.figshare.c.5694595.v1).

501 **Table S12:** Concentrations of the SCFAs (in  $\mu\text{mol/L}$ ) and BAs (in  $\mu\text{g/L}$ ) measured during targeted  
502 GC-MS and LC-HRMS, respectively. Dynamic range for the SCFA and BA measurements ranges  
503 from 10 to 4 000  $\mu\text{mol/L}$  and from 50 to 4 000  $\mu\text{g/L}$ , respectively.

504 **Table S13:** Intensities measured during an untargeted metabolomics analysis using GC-MS.

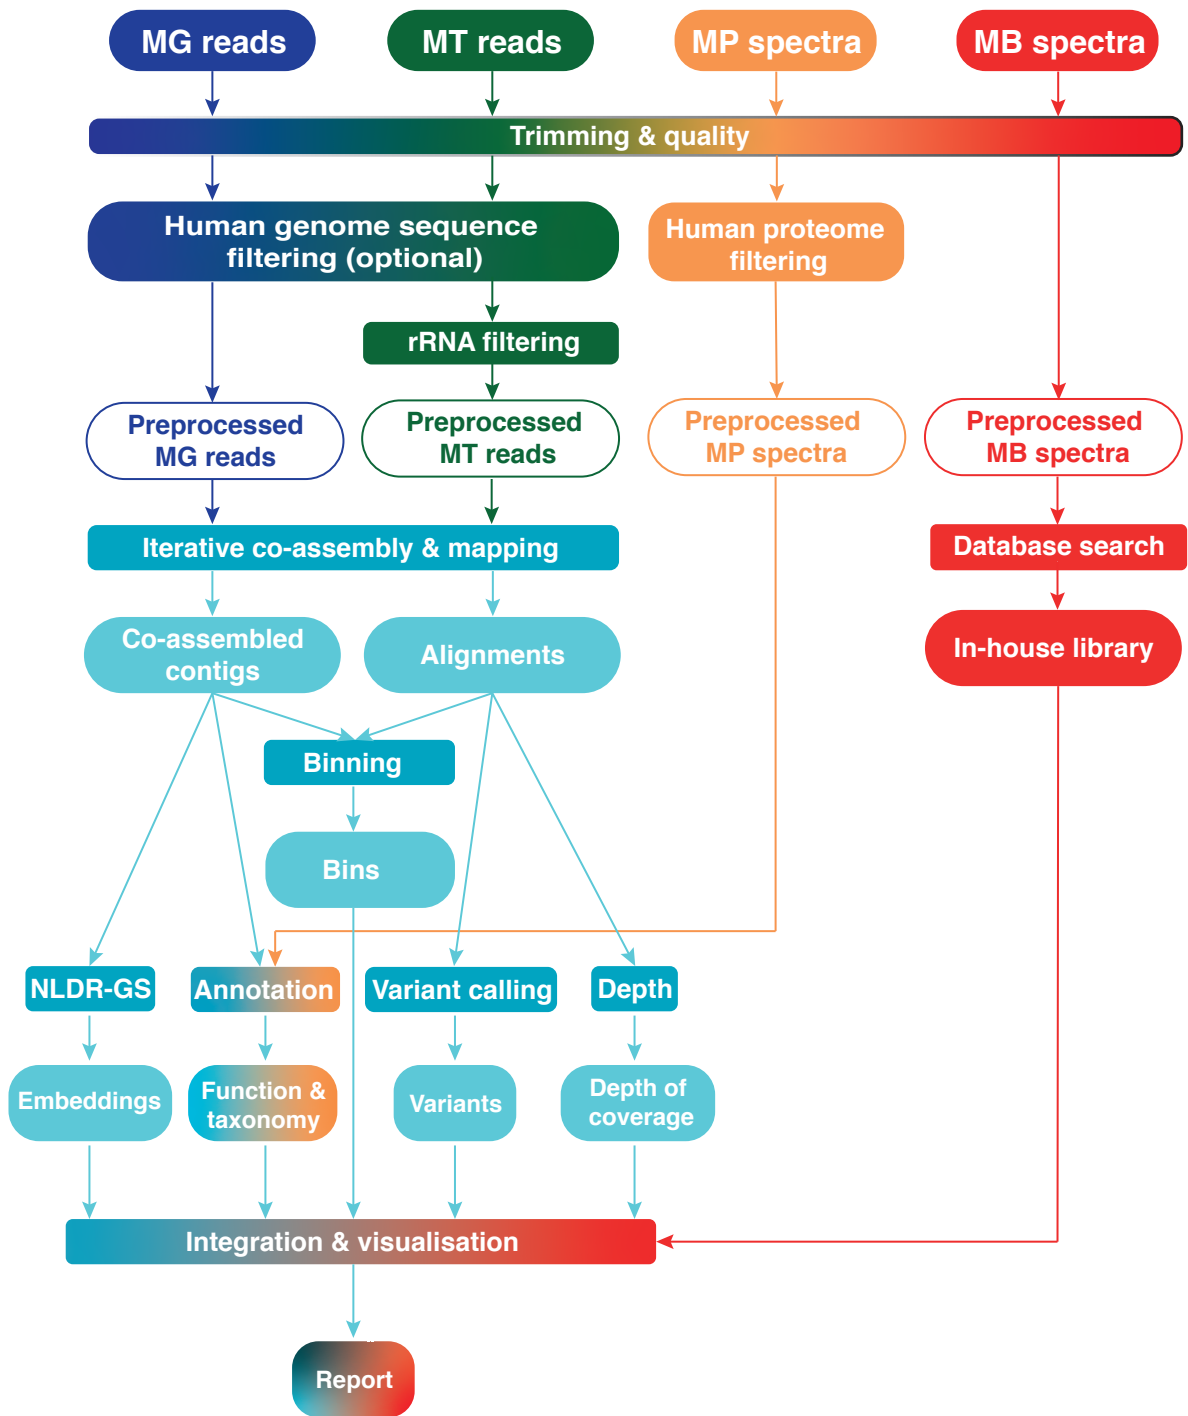



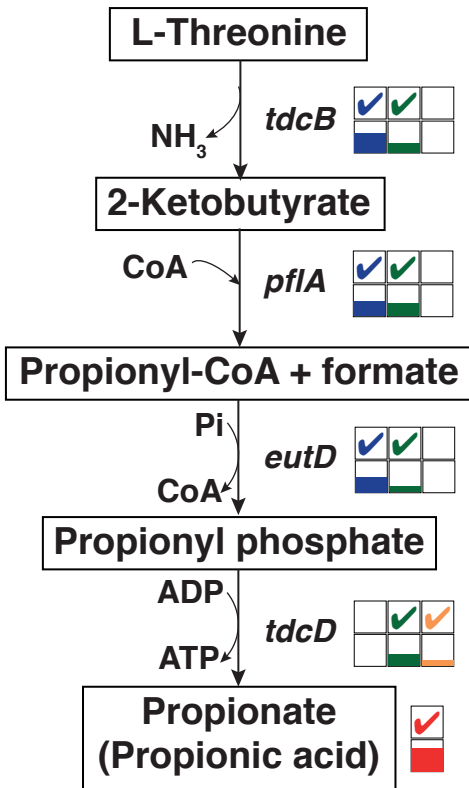

## Legend

- ex-DNA/int-DNA
- ex-IRNA/ex-sRNA
- ex-Prot
- Metabolite

**A**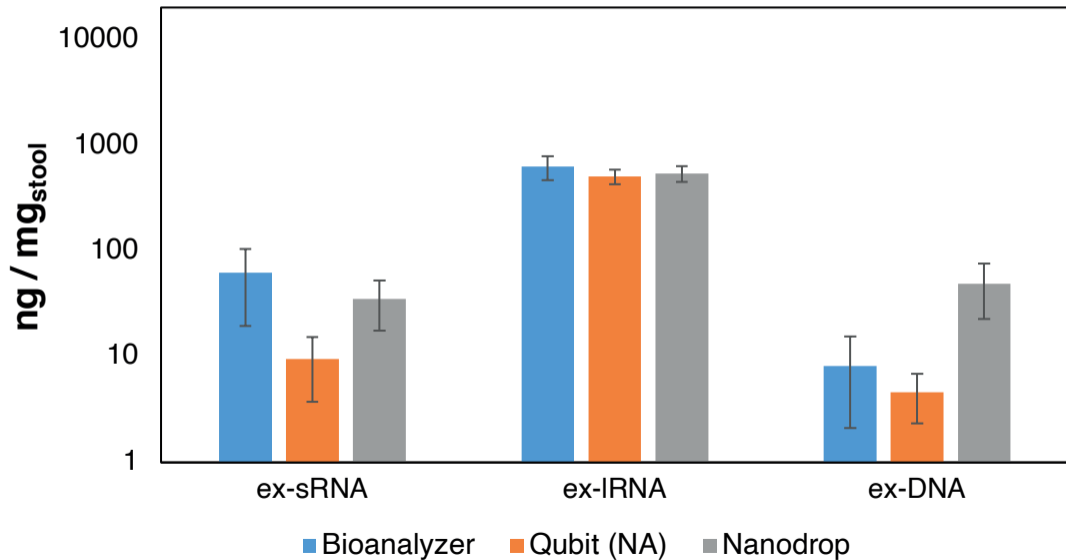**B**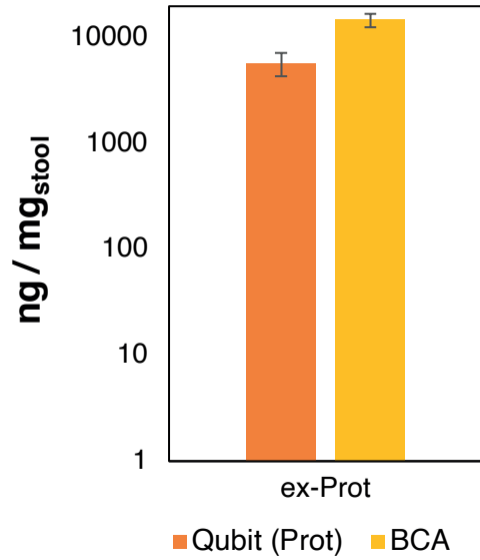

**A**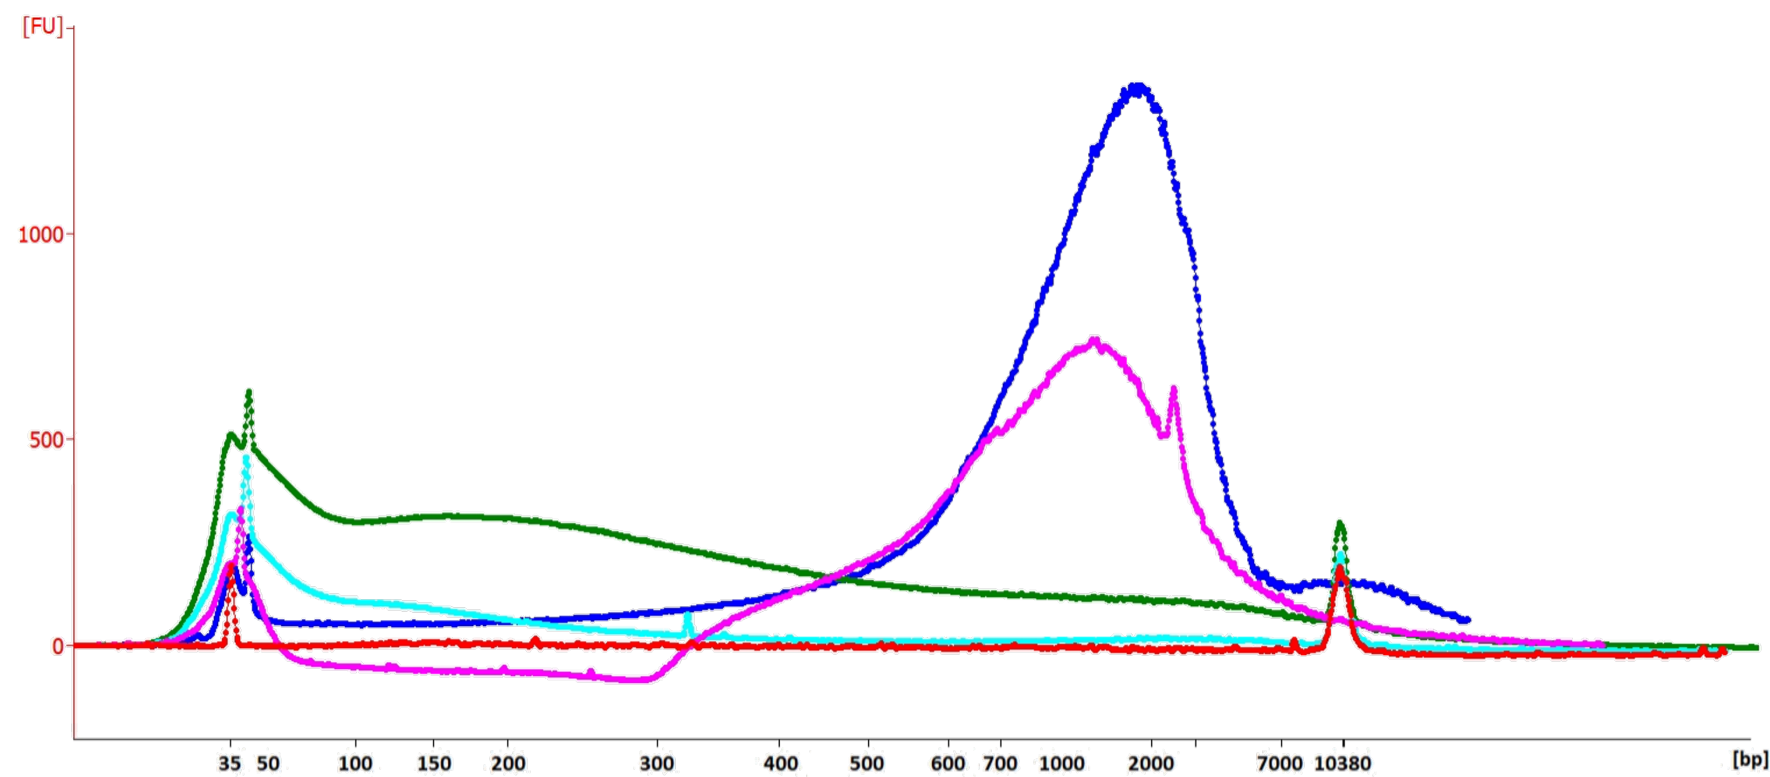**B**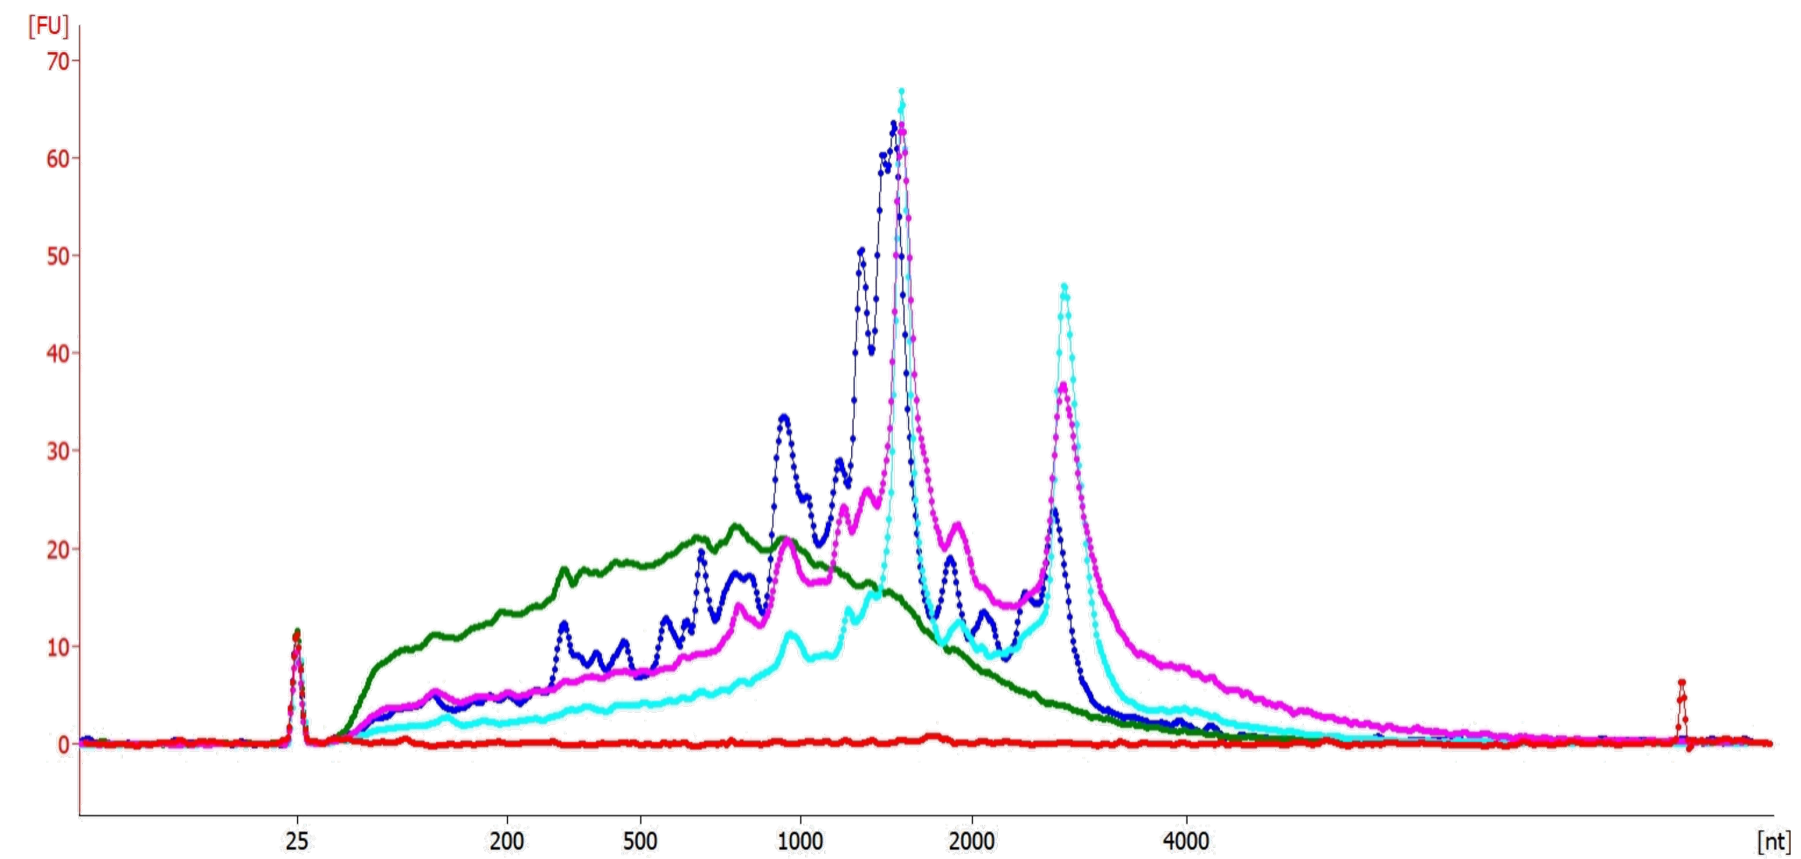**C**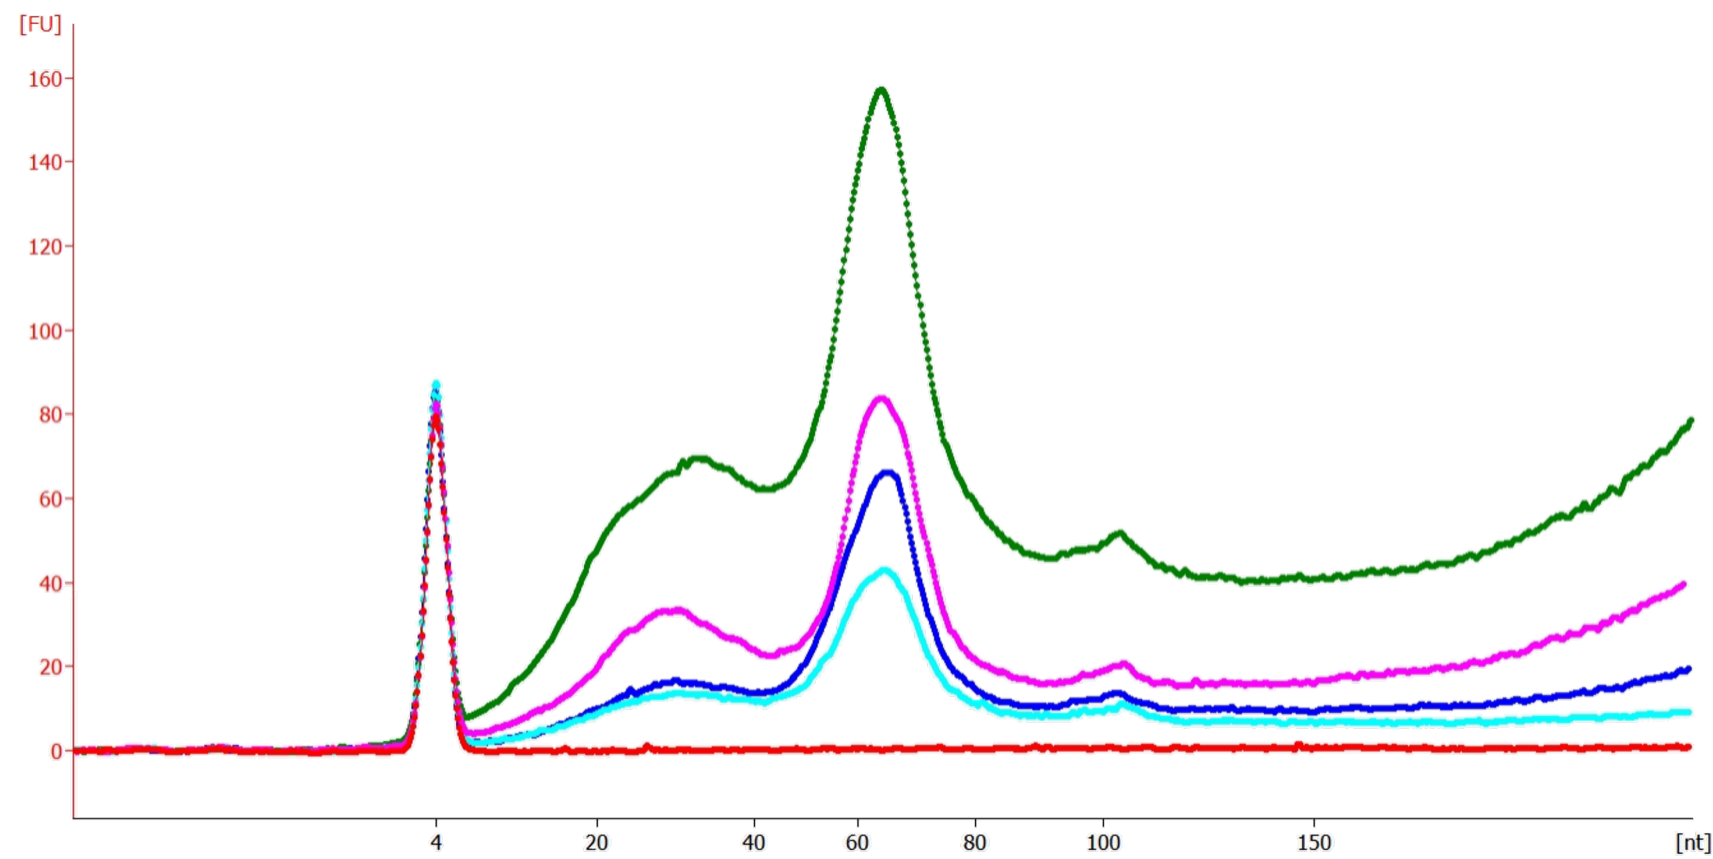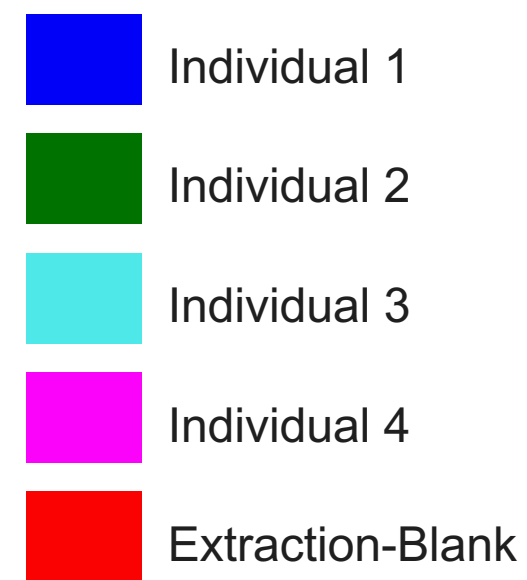

**A**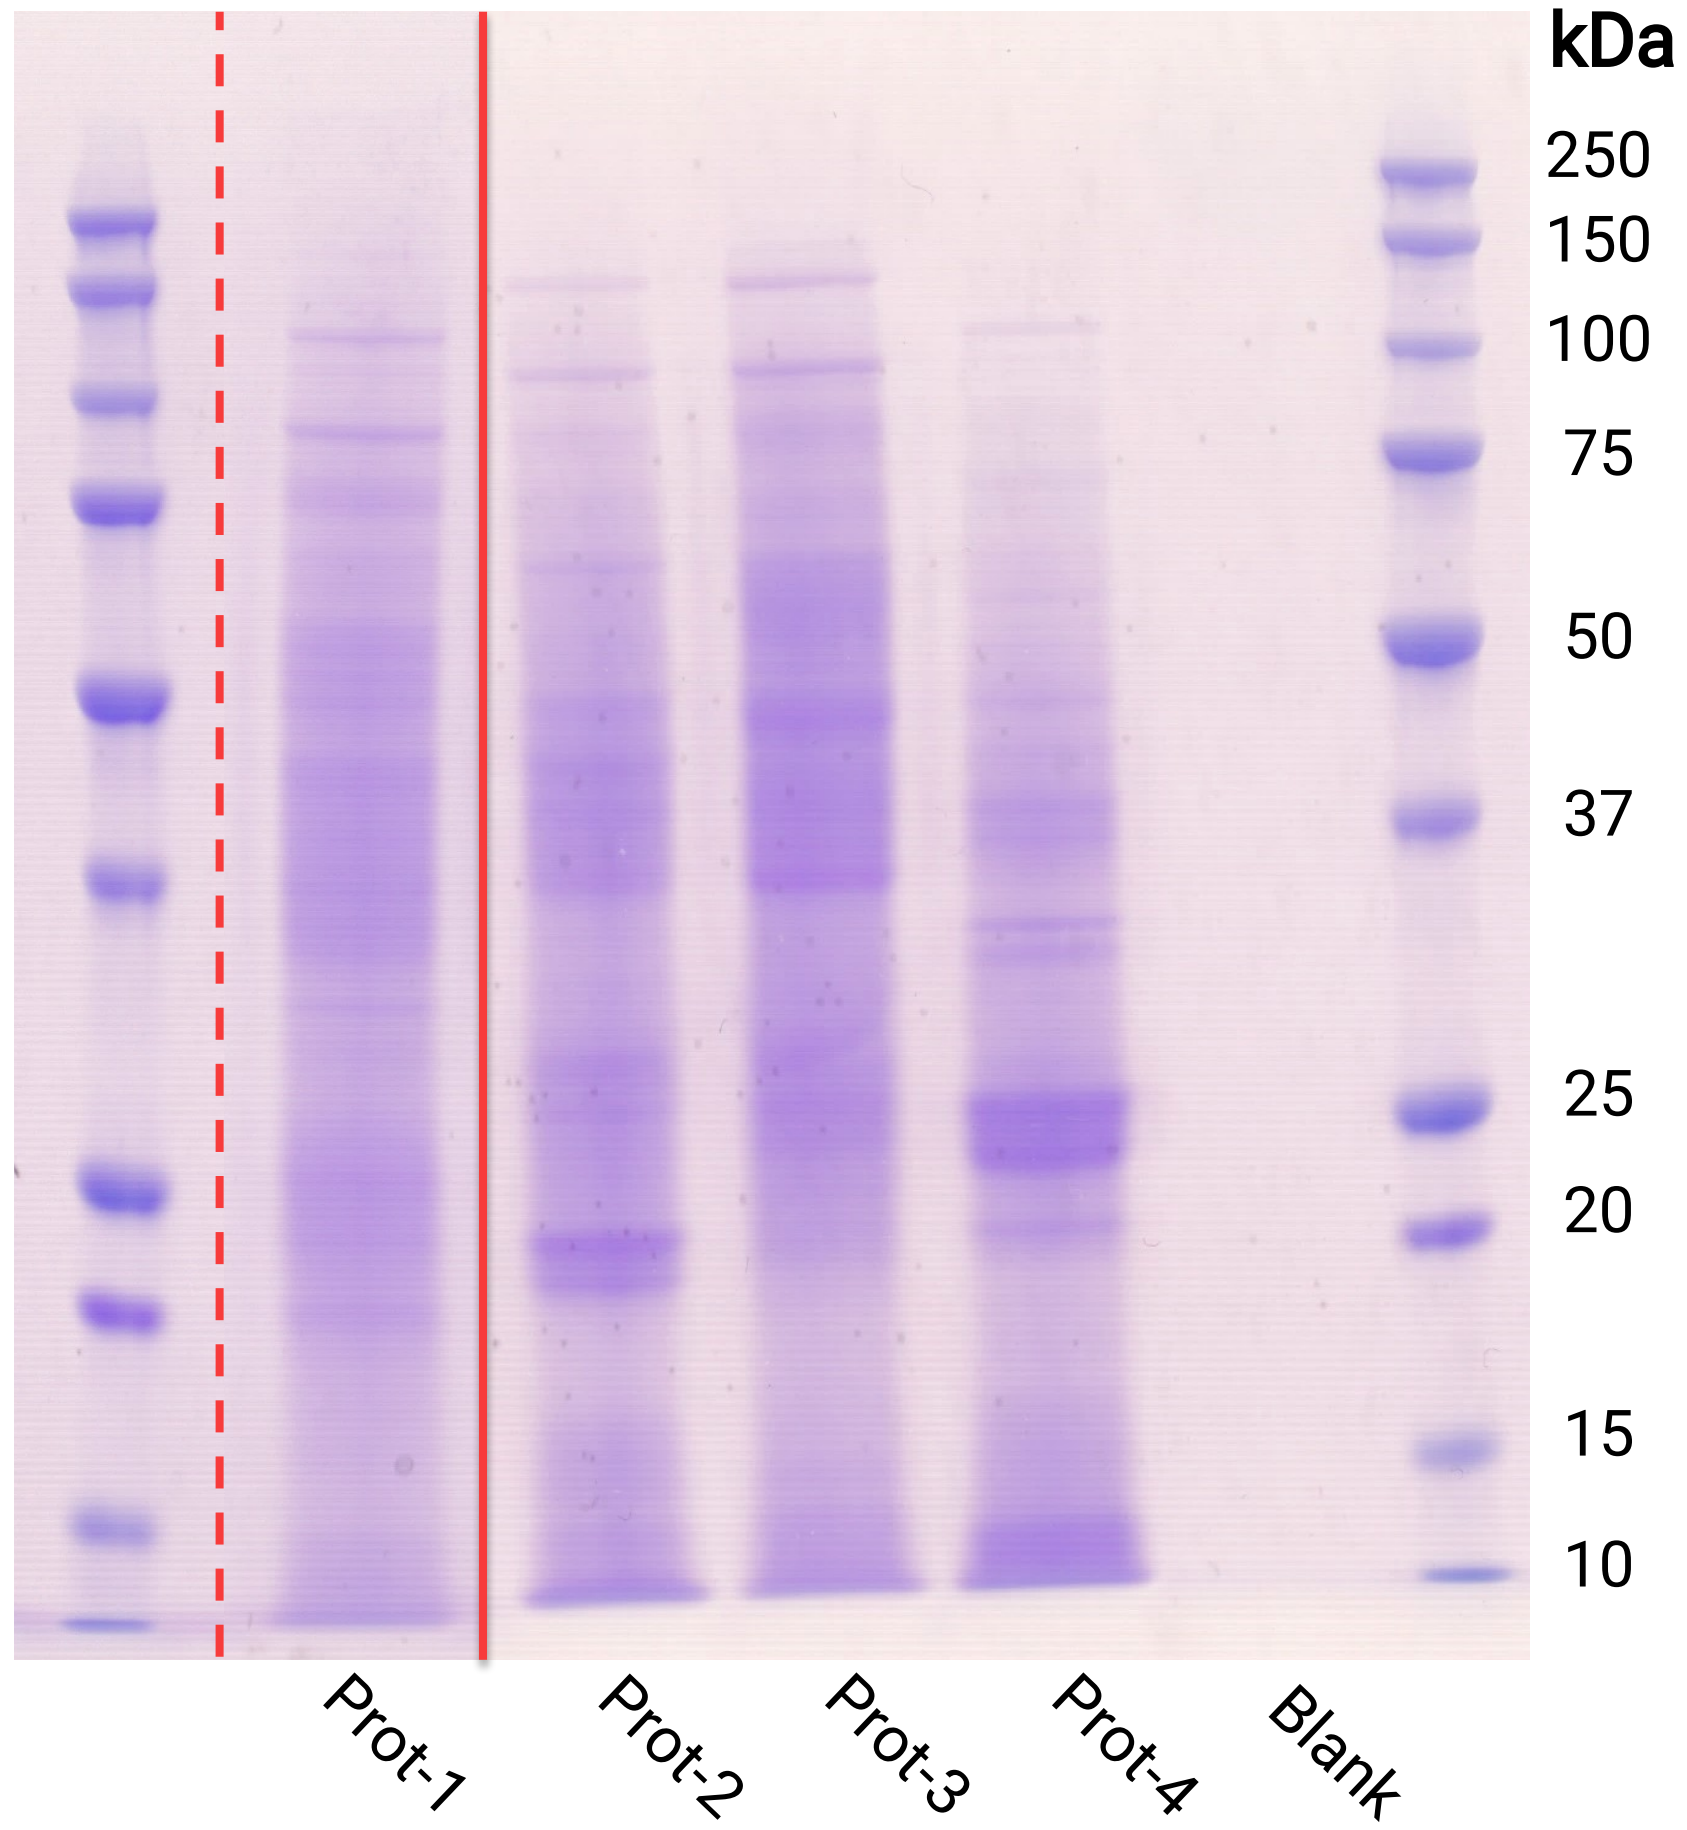**B**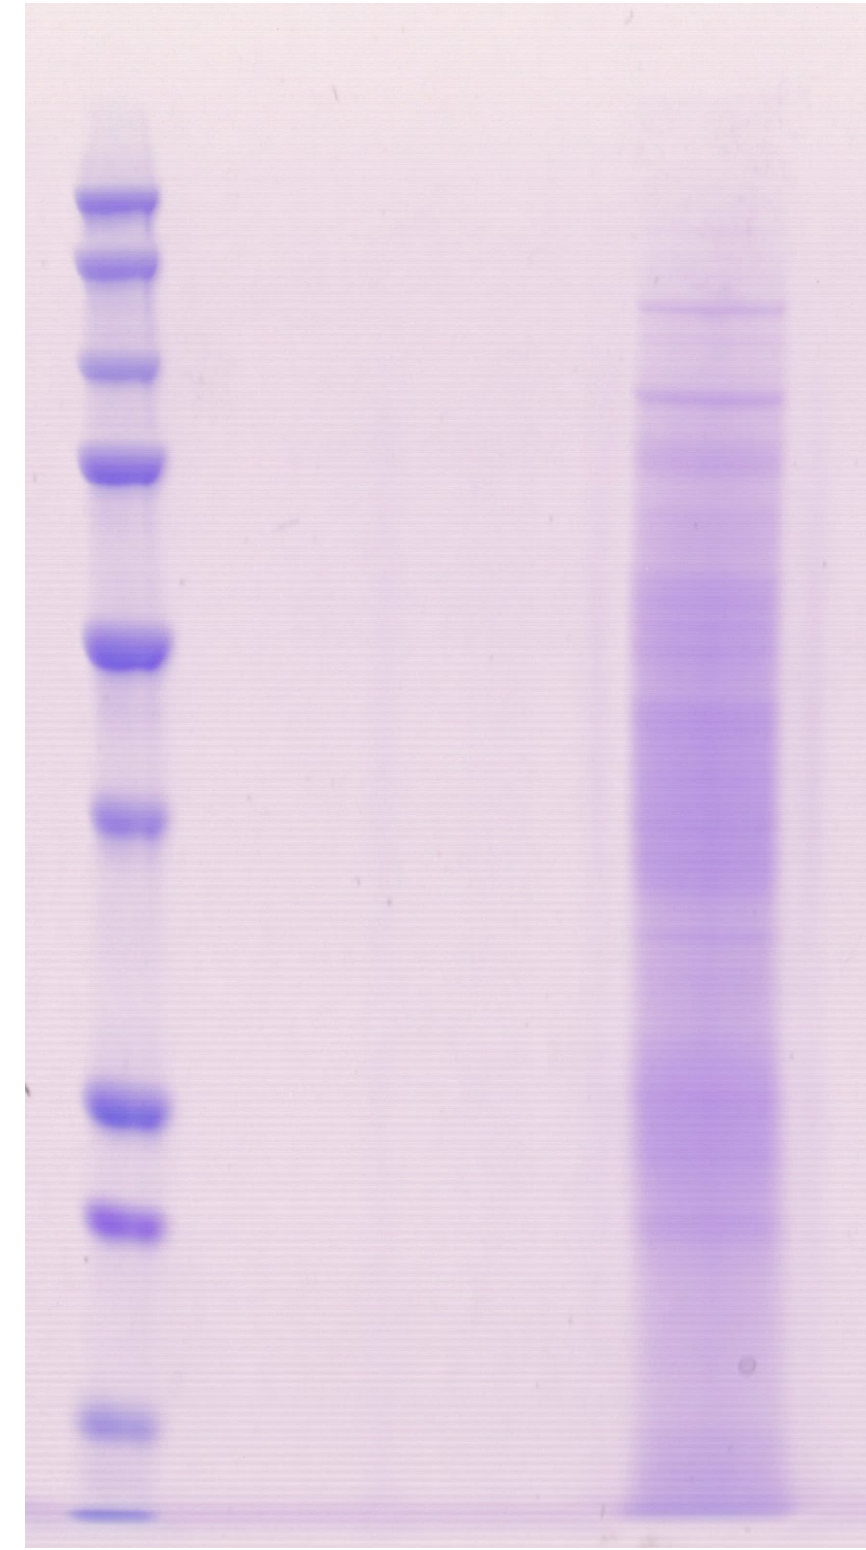

**A**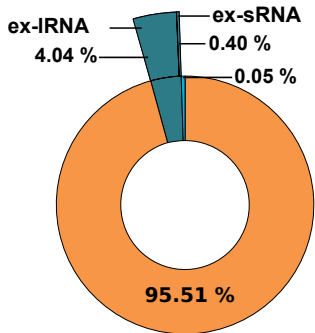**B**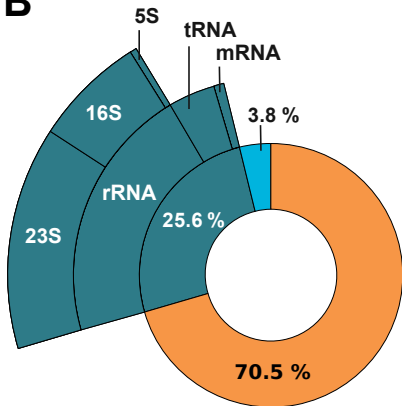 DNA RNA Prot

**A****Individual 1**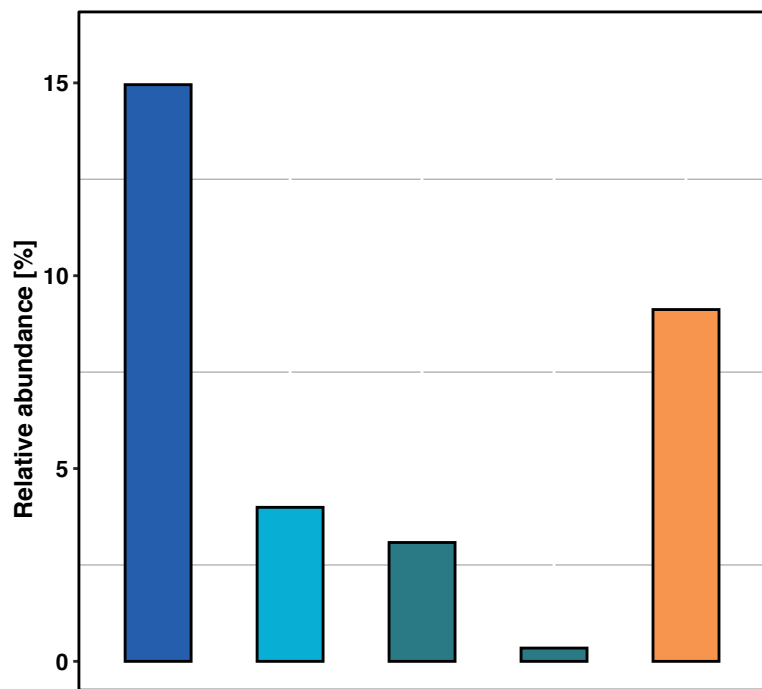**B****Individual 2**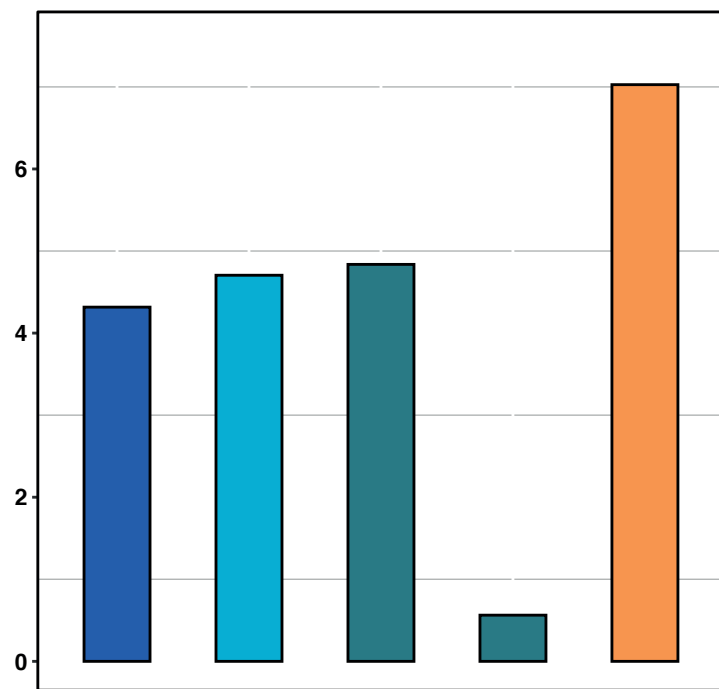**C****Individual 3**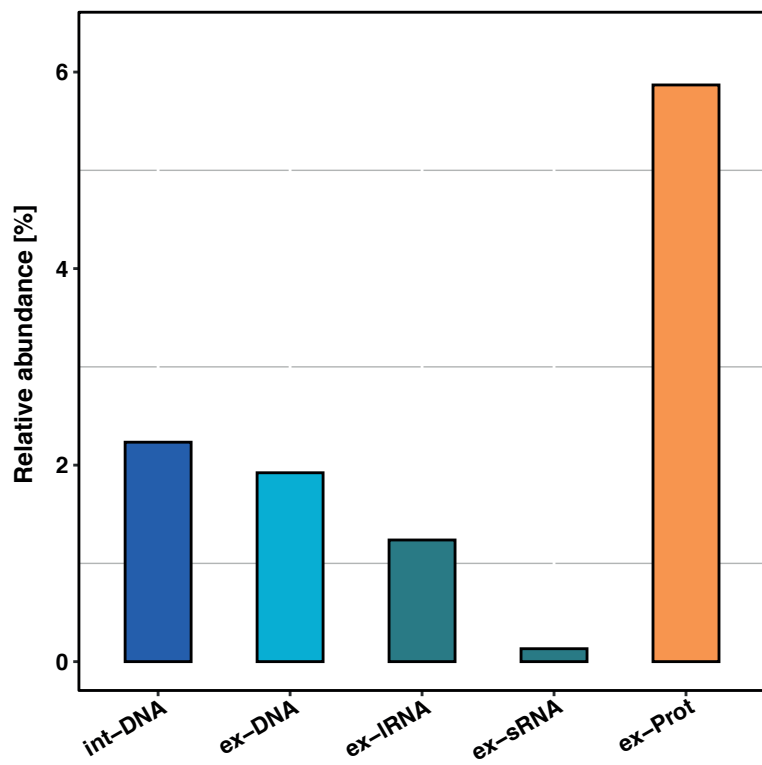**D****Individual 4**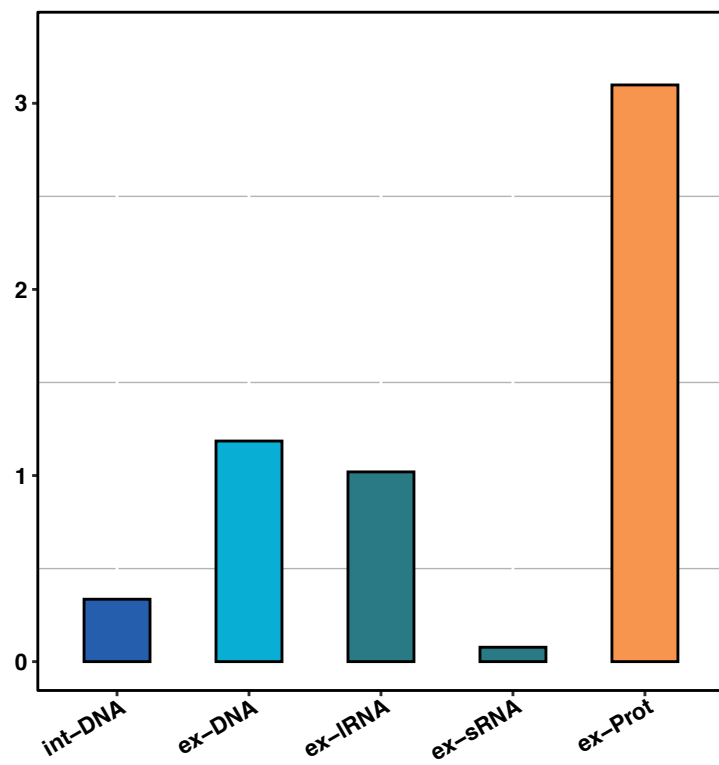

A

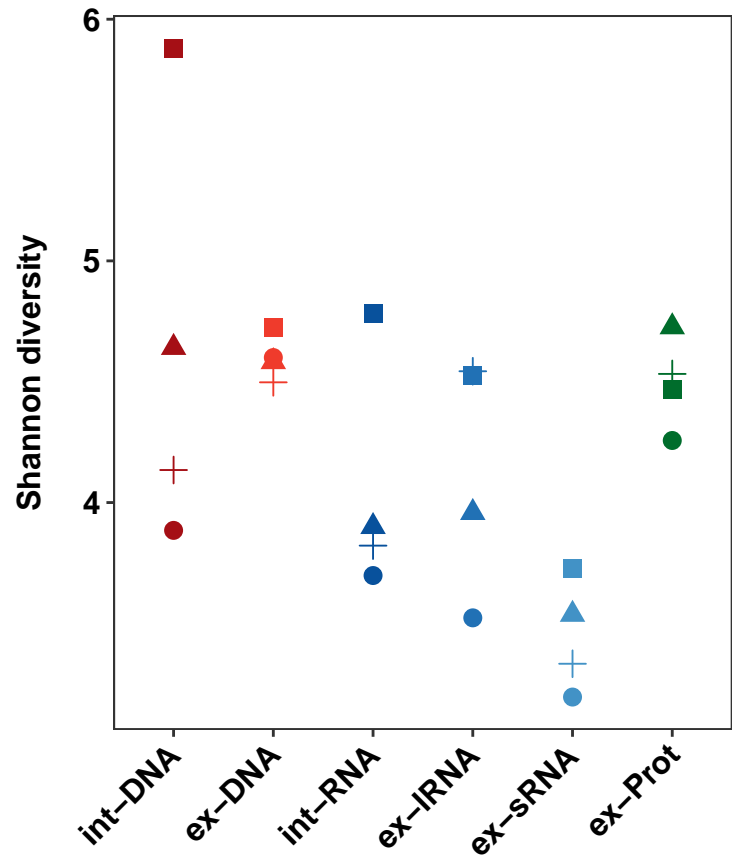

B

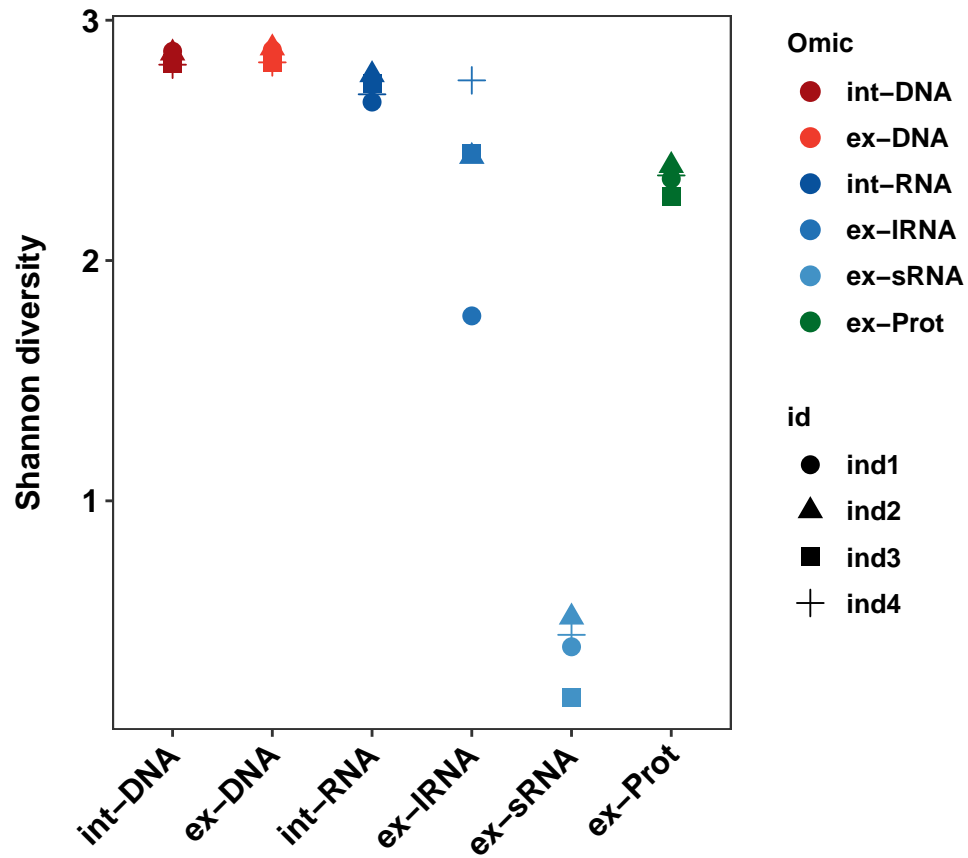

Omic

- int-DNA
- ex-DNA
- int-RNA
- ex-IRNA
- ex-sRNA
- ex-Prot

id

- ind1
- ▲ ind2
- ind3
- ⊕ ind4

**A**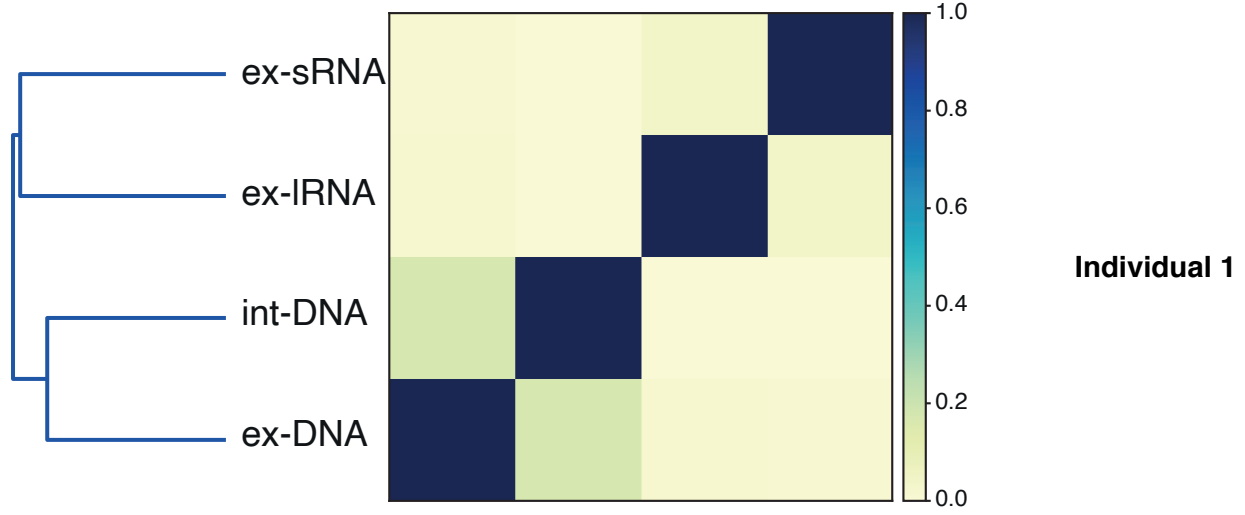**B**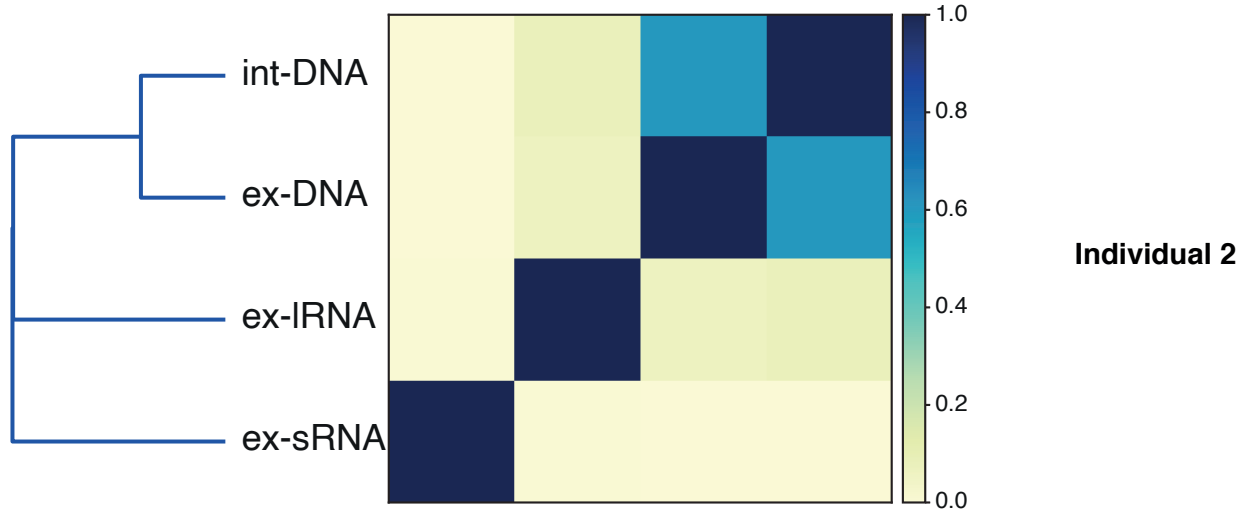**C**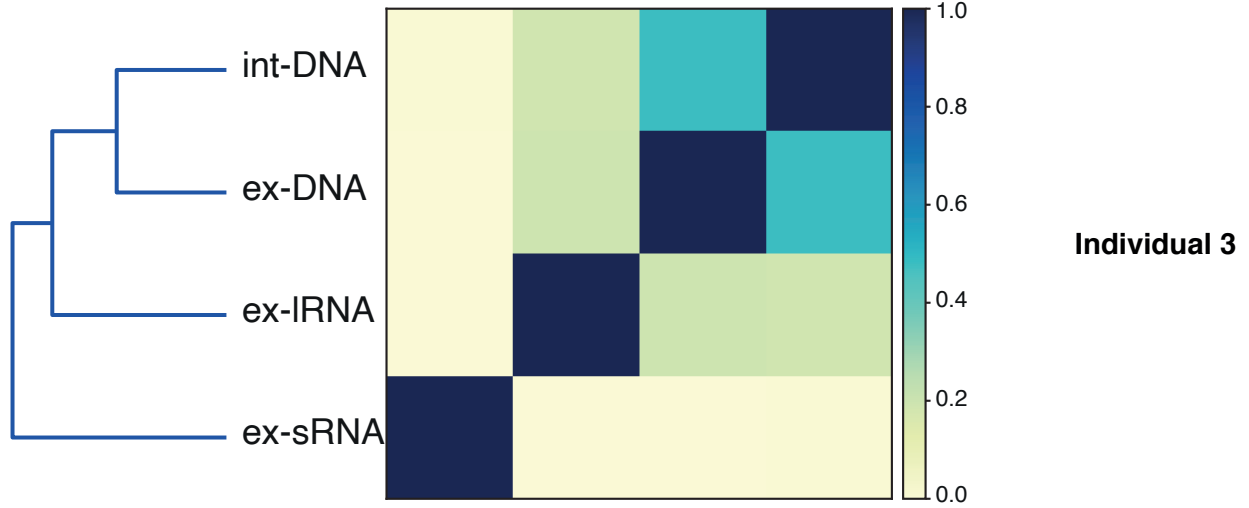**D**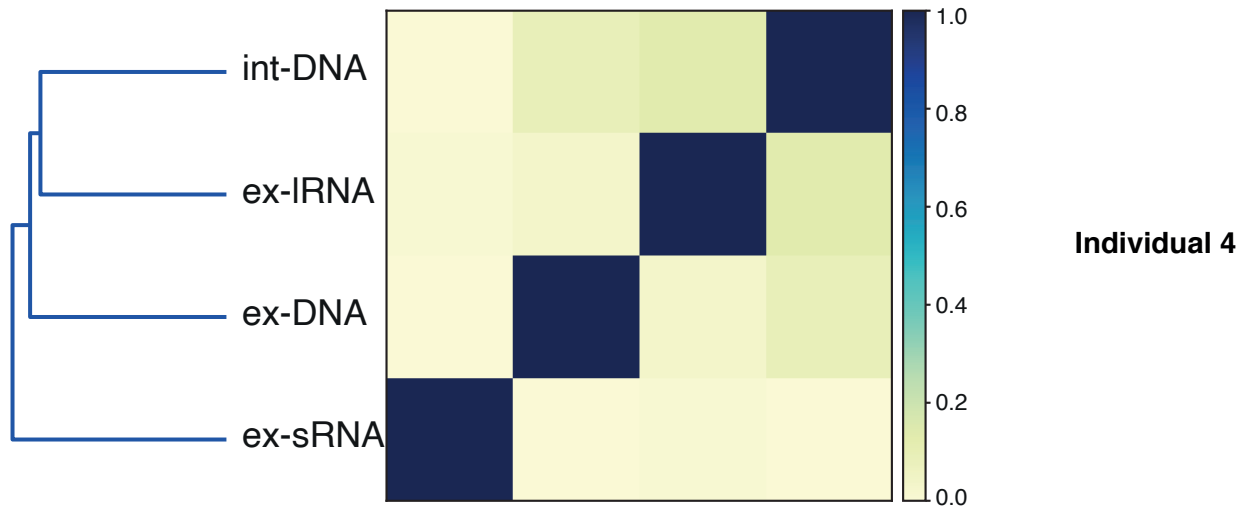



**A**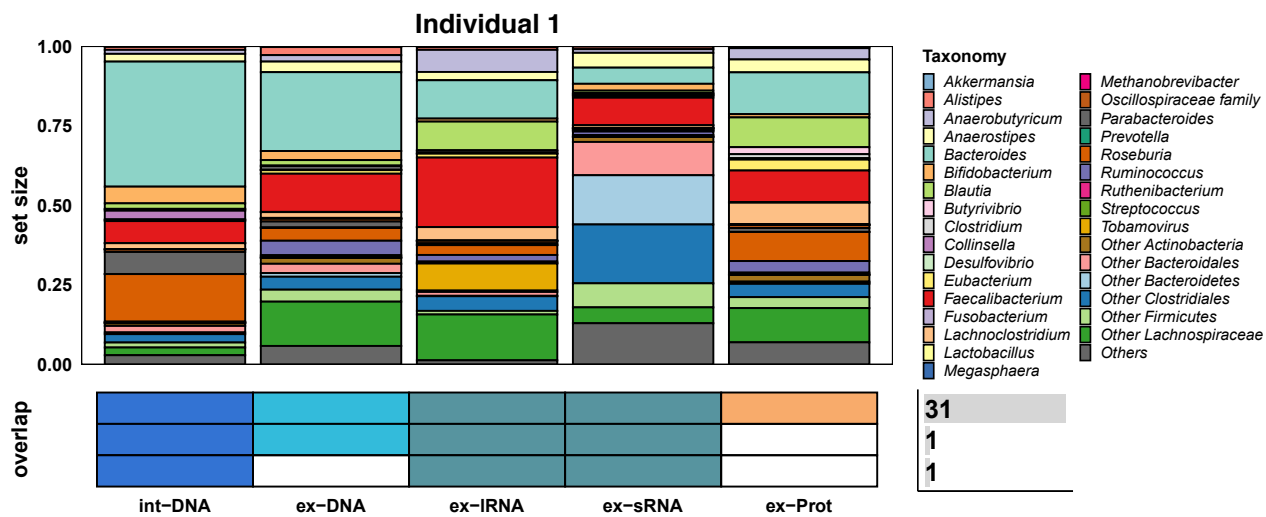**B**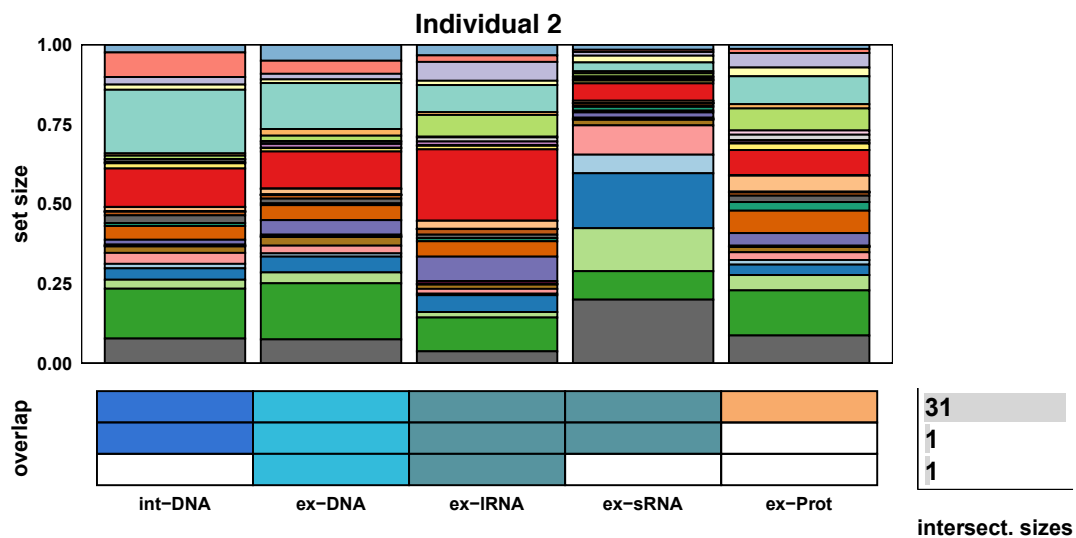**C**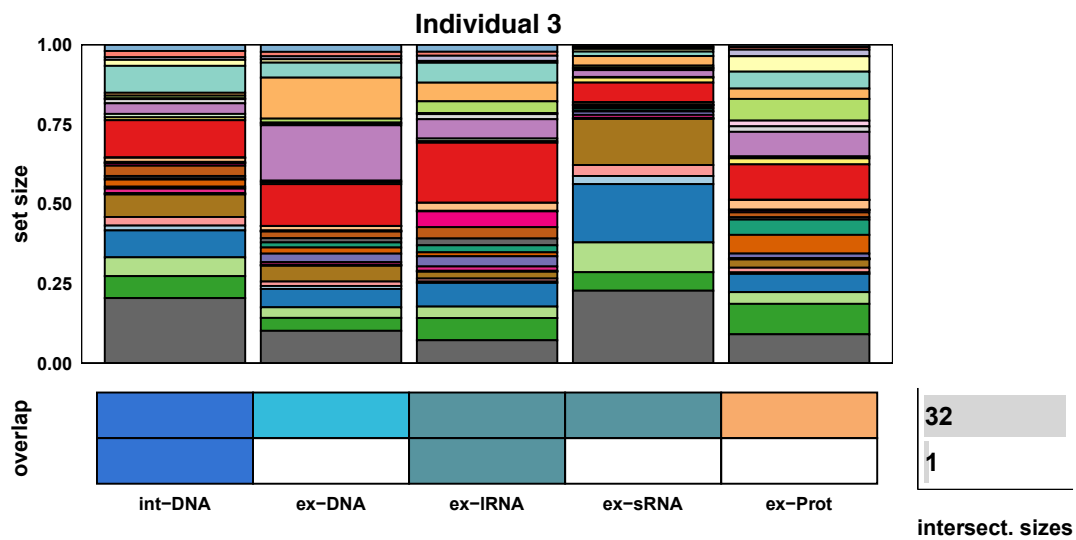**D**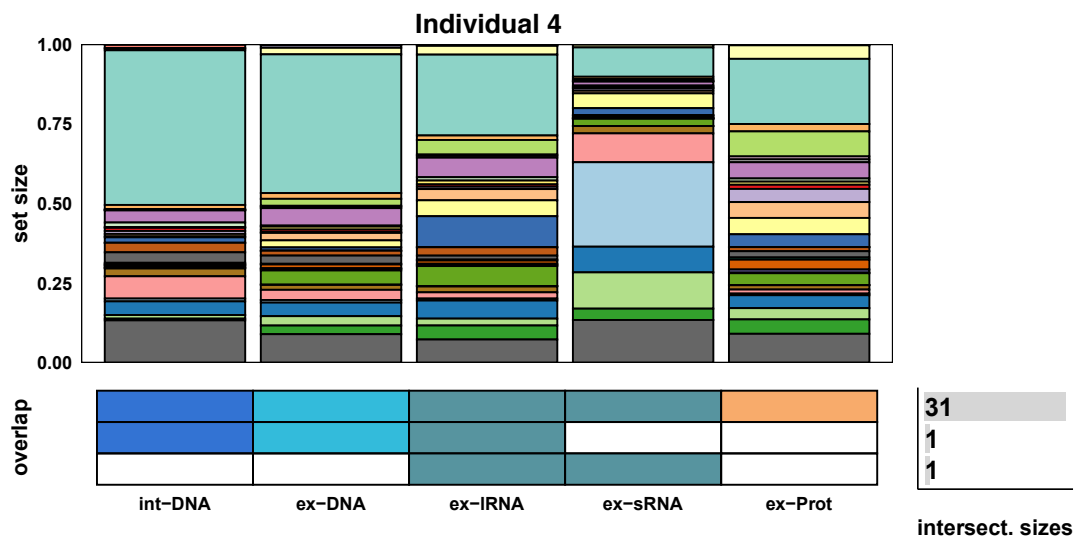

**A**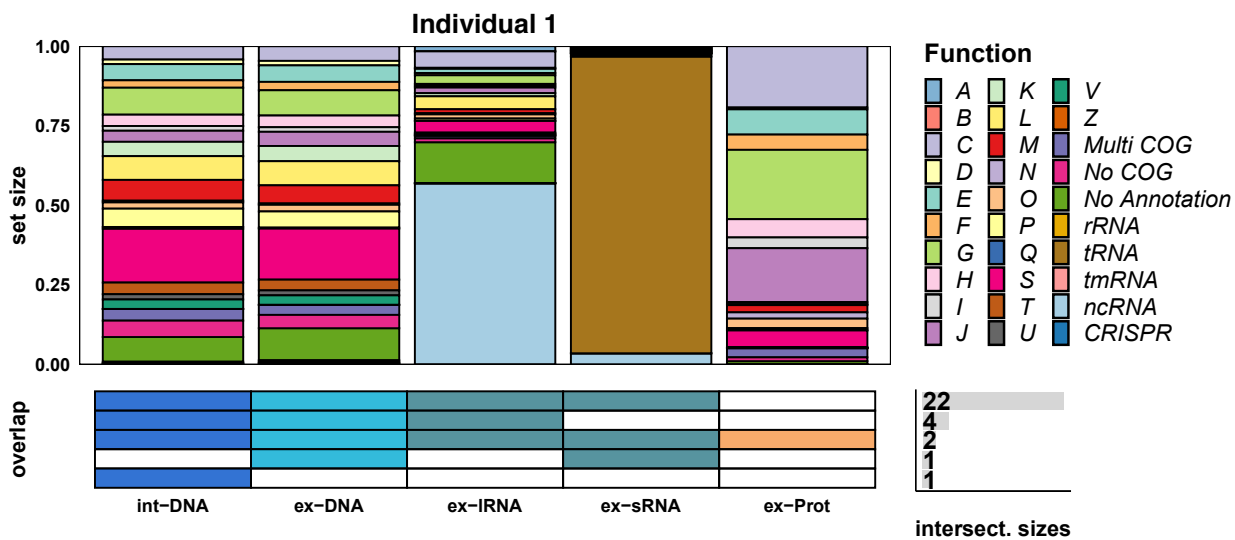**B**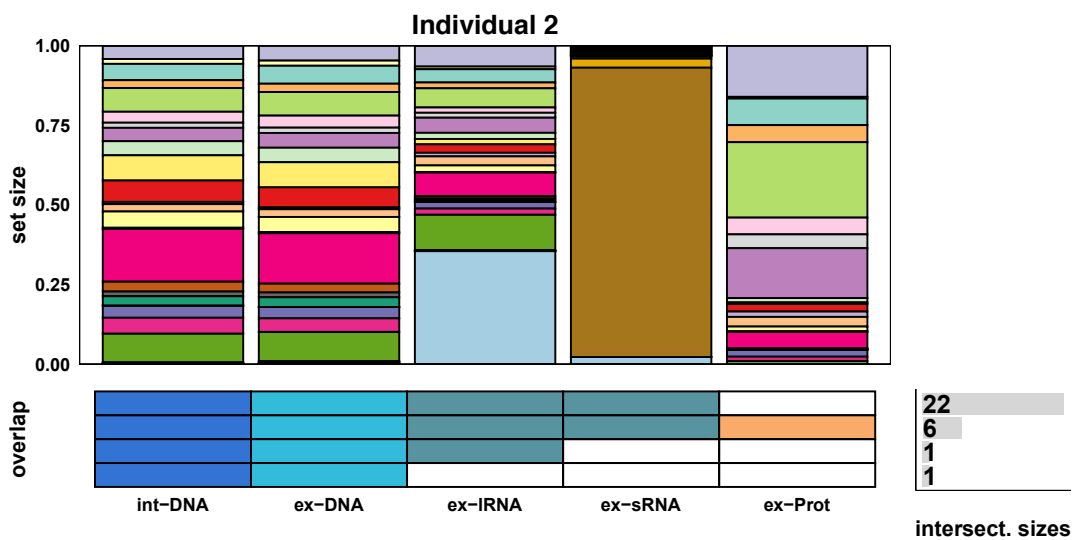**C**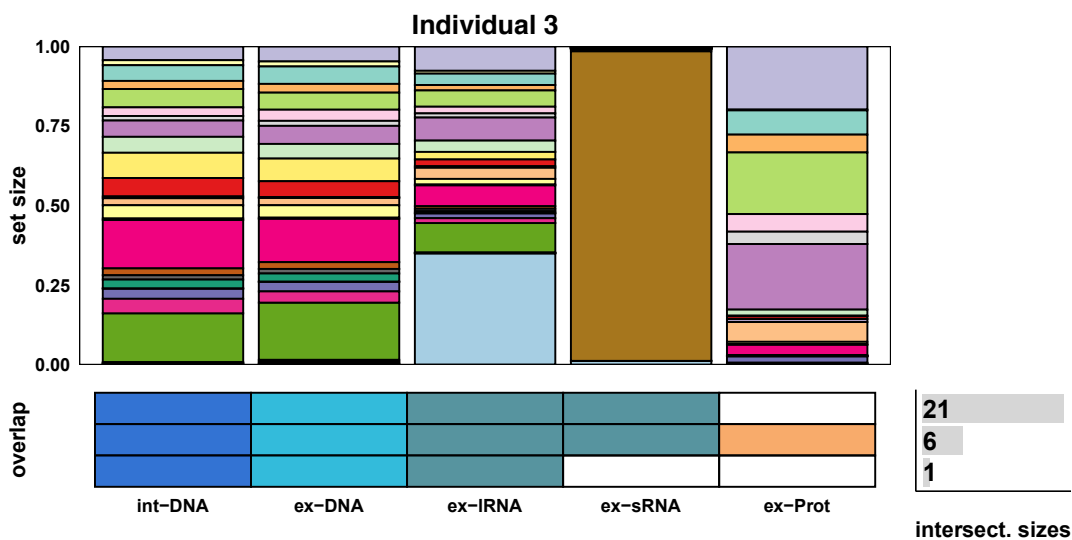**D**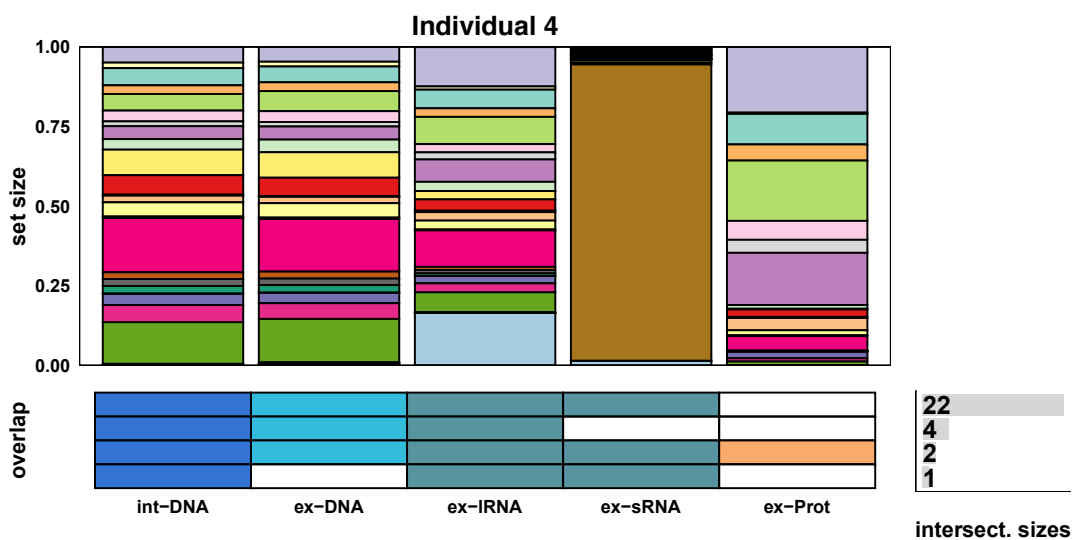

**A**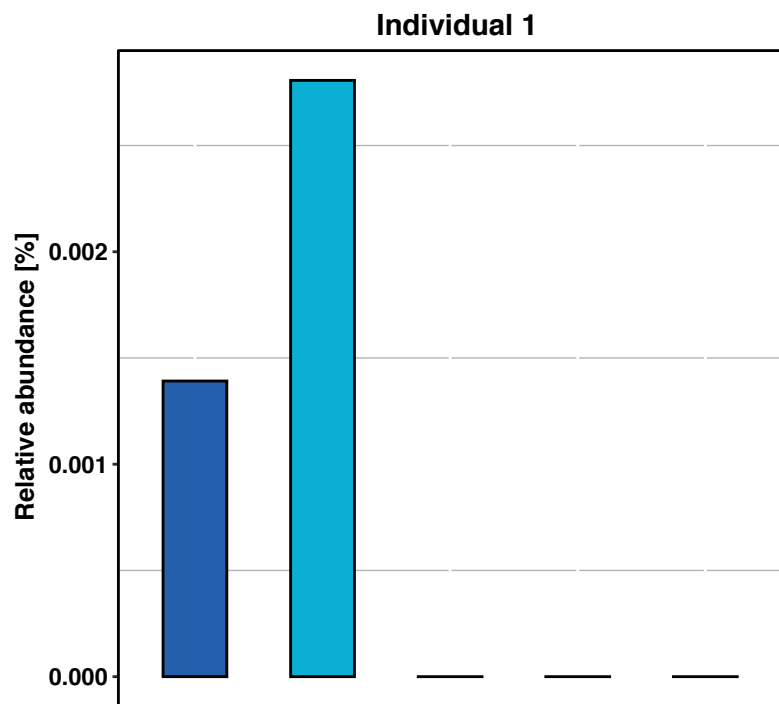**B**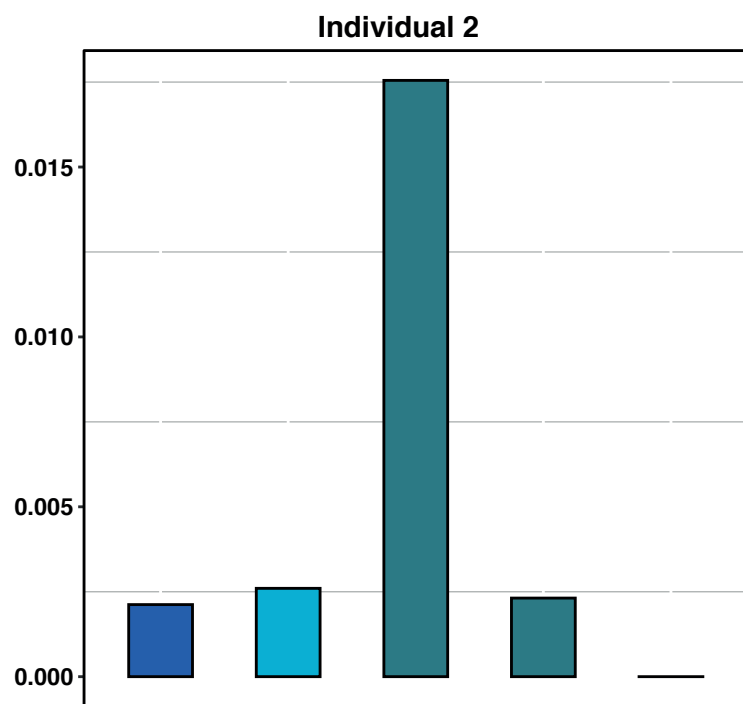**C**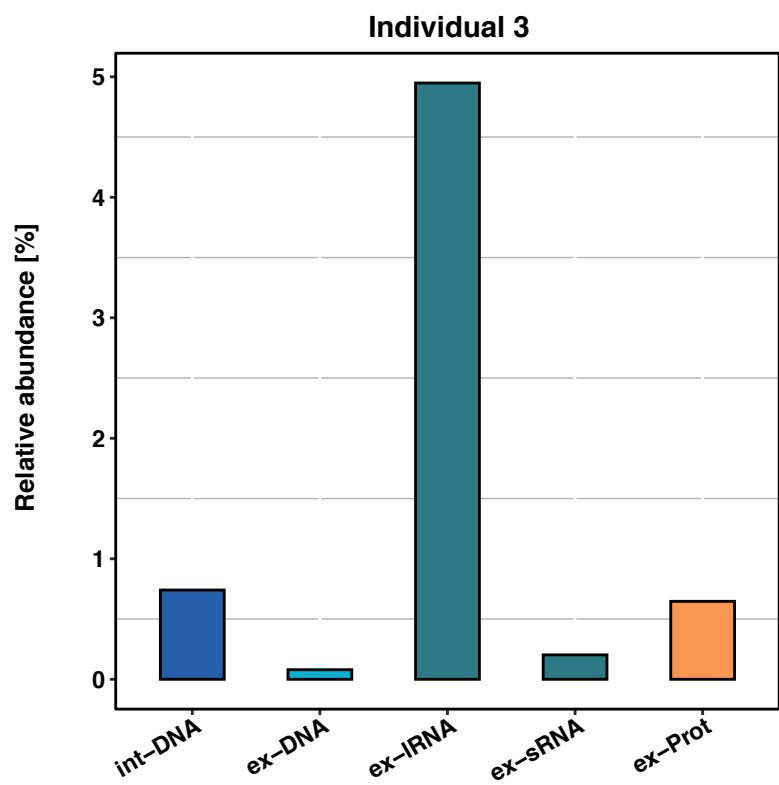**D**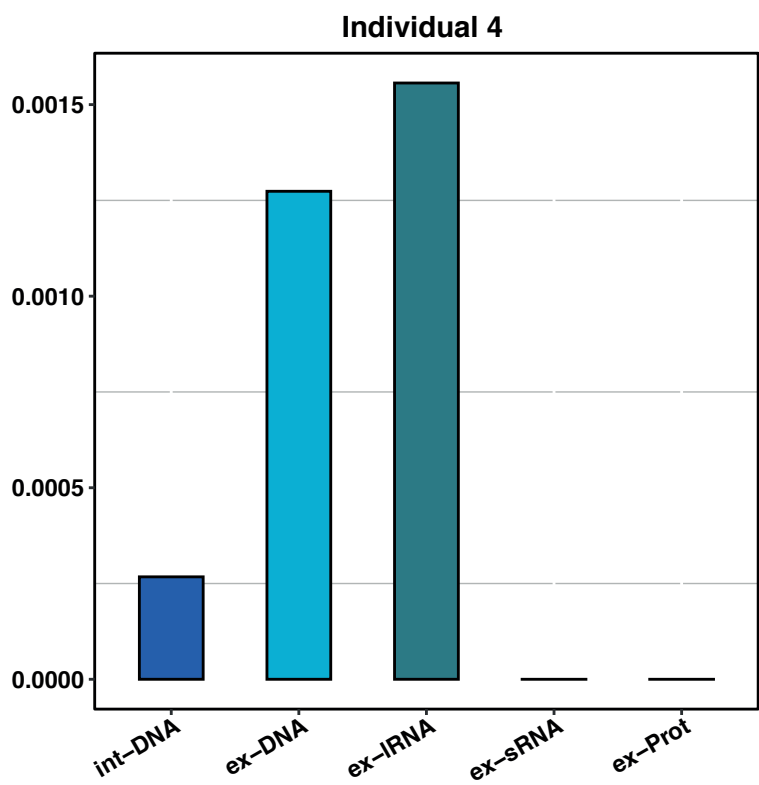

Supplement: EMS140700-supplement-Supplementary_Materials_and_Methods.pdf [file EMS140700-supplement-Supplementary_Materials_and_Methods.pdf]
